# Supplementary material for: Examining the vertical heterogeneity of aerosols over the Southern Great Plains
Source: Copernicus journal article supplement (doi:10.5194/egusphere-2023-830), 2023-04-28
Supplement: Supplementary file [file egusphere-2023-830-RC2-supplement.pdf]

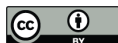

# Examining the vertical heterogeneity of aerosols over the Southern Great Plains

Yang Wang<sup>1,2</sup>, Chanakya Bagya Ramesh<sup>1,2</sup>, Scott E. Giangrande<sup>3</sup>, Jerome Fast<sup>4</sup>, Xianda Gong<sup>5</sup>, Jiaoshi Zhang<sup>5</sup>, Alyssa Matthews<sup>4</sup>, Fan Mei<sup>4</sup>, Ahmet Tolga Odabasi<sup>2</sup>, John E. Shilling<sup>4</sup>, Jason Tomlinson<sup>4</sup>, Die Wang<sup>3</sup>, Jian Wang<sup>5</sup>

<sup>1</sup>Department of Chemical, Environmental and Materials Engineering, University of Miami, Coral Gables, Florida, 33146, United States

<sup>2</sup>Department of Civil, Architectural and Environmental Engineering, Missouri University of Science and Technology, Rolla, Missouri, 65409, United States

<sup>3</sup>Environmental and Climate Sciences Department, Brookhaven National Laboratory, Upton, New York, 11973, United States

<sup>4</sup>Atmospheric Sciences & Global Change, Pacific Northwest National Laboratory, Richland, Washington, 99354, USA

<sup>5</sup>Center for Aerosol Science and Engineering, Washington University in St. Louis, St. Louis, Missouri, 63130, USA

Correspondence to: Yang Wang ([yangwang@miami.edu](mailto:yangwang@miami.edu))

**Abstract.** Atmospheric aerosols affect the global energy budget by scattering and absorbing sunlight (direct effects) and by changing the microphysical structure, lifetime, and coverage of clouds (indirect effects). Both aerosol direct and indirect effects are affected by the vertical distribution of aerosols in the atmosphere, which is further influenced by a range of processes, such as aerosol dynamics, long-range transport, and entrainment. However, many observations of these processes are based on ground measurements, limiting our ability to understand the vertical distribution of aerosols and simulate their impact on clouds and climate. In this work, we examined the vertical heterogeneity of aerosols over the Atmospheric Radiation Measurement (ARM) Southern Great Plains (SGP) using data collected from the Holistic Interactions of Shallow Clouds, Aerosols and Land Ecosystems (HI-SCALE) campaign. The vertical profiles of meteorological and aerosol physiochemical properties up to 2500 m above the ground are examined based on the 38 flights conducted during the HI-SCALE campaign.

The aerosol properties over the SGP show strong vertical heterogeneity and seasonal variabilities. The aerosol concentrations at the surface are the highest due to strong sources of emission at ground level. The mode diameter of these aerosols during summer (~ 100 nm) is larger than that during spring (~ 30 nm), potentially as a result of enhanced condensational growth due to enriched volatile organic compounds in summer. The concentration of aerosols below 30 nm in the boundary layer (BL) (e.g., below 1000 m) during spring is higher than that during summer, a result of the stronger new particle formation (NPF) events and a reduced condensation sink in spring. In the BL, the size of the aerosols gradually increases with altitude due to condensational growth and cloud processing. However, the composition of the aerosols remained similar, with organics and sulfates representing  $59.8 \pm 2.2\%$  and  $22.7 \pm 2.1\%$  of the total mass in the BL. Through the vertical profiles of aerosol properties, we noticed a considerable number of NPF events (7 out of 38) in the upper BL, where the newly formed particles

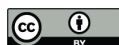

continue to grow as they are mixed down to the surface. There is also an indication that deep convection brings aerosols from the free troposphere (FT) to the surface, where they grow to ~~contribute to the~~ cloud condensation nuclei (CCN). Overall, the vertical heterogeneity of aerosols over the SGP is influenced by aerosol dynamics (new particle formation, growth, and cloud processing) and transport processes (long-range transport, entrainment, and convective downward transport). Case studies showing the influence of these factors are discussed.

## 1 Introduction

Aerosol particles play a substantial role in Earth's atmosphere ~~system~~ by impacting cloud properties, solar and terrestrial radiation budgets, ~~and~~ human and environmental health. These impacts depend strongly on the size, concentration, and chemical composition of aerosols. Atmospheric aerosols undergo dynamic processes, including formation (gas-to-particle conversion), growth, removal, and transport, leading to high spatial and temporal variability. ~~Whereas the~~ vertical profiles of aerosol properties are needed to understand some of the key processes influencing the aerosol-cloud interactions at cloud levels; ~~most~~ observations of aerosols have been conducted at ground/sea level.

The U.S. Department of Energy (DOE) ARM SGP observatory is one of the world's largest and most extensive climate research facilities (Ackerman and Stokes, 2003; Mather and Voyles, 2013). ~~While the~~ SGP is located in a rural environment with the nearest population centers approximately 40 km away, ~~this area~~ is influenced by a mixture of anthropogenic, biogenic, and biomass-burning sources of aerosols and their precursors. ~~As a result, there are~~ potentially large horizontal and vertical variations of aerosol properties across the area. Ground observation at the SGP showed that NPF, the process where stable particles of around 1 nm are formed from gas-phase sulfuric acid molecules and stabilizing vapors (such as water, ammonia, amine, and oxidized organic molecules), is commonly observed throughout the year (Marinescu et al., 2019). High particle concentrations, observed mostly during the daytime, were well correlated with the elevated sulfur dioxide (SO<sub>2</sub>) mixing ratios, suggesting sulfuric acid is among the main nucleating species at the SGP (Wang et al., 2006). The growth law analysis showed that the overall particle growth at the SGP was dominated by volume-controlled reactions (~~e.g., aqueous reaction and gas/particle partitioning~~), not through surface-area driven processes (~~e.g., condensation~~) (Wang et al., 2006). Chemical analyses with ~~the~~ aerosol mass spectrometer showed that organics and sulfate dominate the aerosol composition at the SGP (Liu et al., 2021). Oxygenated organic aerosols are identified as the dominant factor of organic aerosols for both the spring and summer, although more aged in spring.

Previous studies at the SGP also showed interesting features regarding the vertical heterogeneity of aerosols. During the DOE New Particle Formation Study 2013 (NPF2013) (Smith and McMurry, 2015), measurements onboard a tethered balloon show that NPF usually occurs in the upper BL, then the newly formed particles rapidly mixed throughout the BL (Chen et al., 2018). These observations suggest that NPF may originate from the upper BL instead of near the surface. A recent study examined

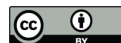

65 the vertical profile of NPF and aerosol growth in the SGP BL with models and observations from the HI-SCALE campaign  
data (O'Donnell et al., 2023). This study used a column aerosol chemistry and microphysics model to probe factors that  
influence the vertical profile of NPF and found enhanced NPF rates in the upper mixed layer. This enhancement is primarily  
due to the temperature dependence in the NPF schemes but is also dependent on the vertical profile of gas-phase precursors.  
Apart from newly formed particles, vertically compact aerosol layers, which were traced back to forest fires in East Asia, were  
70 intercepted at altitudes over 3000 m (Wang et al., 2006). Wildfire plumes can also transport through the FT and eventually be  
observed at the SGP. Currently, these measurements regarding the vertical distribution of aerosols are either analyzed at lower  
altitudes (below 1200 m) or during a short period of time, limiting our understanding of how these aerosols are affected by the  
dynamics in the BL and lower FT and how these aerosols may impact the cloud properties.

75 The DOE-ARM HI-SCALE campaign was conducted in 2016 at the SGP to understand shallow convective clouds and their  
coupling to land-atmosphere interactions, boundary layer turbulence, and the aerosol life cycle (Fast et al., 2019; Fast et al.,  
2022; Kulkarni et al., 2023). One goal of the HI-SCALE campaign was to provide a detailed set of aircraft and surface  
measurements needed to improve the understanding and parameterizations of the life cycle of aerosols and their impact on  
shallow clouds. A total of 38 flights (17 in spring and 21 in summer) were conducted during the HI-SCALE campaign with a  
80 wide spatial and altitude coverage, enabling a statistically robust analysis of aerosol-cloud interactions under different  
atmospheric conditions. In this study, we analyzed these aircraft measurements and characterized the vertical profiles of aerosol  
properties. Key aerosol dynamic processes and transport phenomena that control the aerosol population are investigated by  
examining the vertical profiles of aerosol properties and their variations between the seasons.

## 2 Measurement overview

85 The HI-SCALE campaign consisted of two 4-week intensive observational periods (IOPs), one occurring from April 24 to  
May 21, 2016 (denoted as “spring” IOP) and one running from August 28 to September 24, 2016 (denoted as “summer” IOP)  
to take advantage of different stages and distribution of the “greenness” of cultivated crops, pasture, herbaceous, and forest  
vegetation types (Fast et al., 2019). The Gulfstream-1 (G-1) aircraft (Schmid et al., 2014) was deployed to examine the spatial  
and temporal variation of aerosol properties over the SGP observatory (36°36'26'' N, 97°29'16'' W), covering altitudes of  
90 200 to 3000 m above ground level (AGL). G-1 was stationed at the airport in Bartlesville, which is approximately 130 km east  
of the SGP observatory. Fig. 1 shows the dates and durations of the flights. Same-day flights were conducted during summer  
to examine the temporal variation of aerosols over the SGP. Each flight consisted of four to six vertical profiles (excluding  
those leaving and arriving at the airport), providing the aerosol and corresponding meteorological properties as a function of  
altitude. The flight tracks used during the HI-SCALE campaign and the flight track of a representative research flight are  
95 shown in Fig. 2. The aerosol properties presented here are based on the measurements in the BL and lower FT (< 3 km) over  
the SGP.



Measurements onboard the G-1 included meteorological parameters, ~~trace gas species, aerosol,~~ and cloud properties (Fast et al., 2019). ~~Measurements used in this study are described briefly below.~~ The structure of the BL was derived from the measured vertical profile of potential temperature, from which the boundary between the BL and FT is ~~often clearly defined by an abrupt increase of the potential temperature with altitude (i.e., temperature inversion).~~ When the inversion is not obvious, liquid water content (LWC) and water vapor mixing ratio ( $w$ ) profiles are used to help identify the cloud top and define the BL height (a rapid increase of LWC or decrease in  $w$ ).  $w$  is calculated from the ambient temperature and dew point measured onboard the G-1. The mixing ratios of CO, O<sub>3</sub>, and SO<sub>2</sub> were measured by trace gas monitors (Los Gatos Research, Inc., N2O/COR-23r, Thermo Scientific model 49i, and Thermo Scientific model 43i-TLE, respectively).

The aerosol particles were sampled using an isokinetic inlet that has a 50% upper cut-off size of 5  $\mu\text{m}$  (Schmid et al., 2014) and were subsequently dried with a Nafion tube. Aerosol size distributions from 10 nm to  $\sim 600$  nm were measured by a fast-integrated mobility spectrometer (FIMS) (Wang et al., 2018; Kulkarni and Wang, 2006). The total number concentration of particles larger than 3 nm ( $N_{>3}$ ) and 10 nm in diameter ( $N_{>10}$ ) were measured by two condensation particle counters (CPC 3025A and CPC 3010, TSI Inc.). A high-resolution time-of-flight aerosol mass spectrometer (HR-ToF-AMS) (Canagaratna et al., 2007) was deployed to characterize sub-micrometer non-refractory aerosol composition. For this study, we present the measurement of organics, sulfate, ammonium, and nitrate (chloride is refractory and has a very low concentration and therefore is not reported). Cloud LWC is calculated by integrating the droplet size distribution measured by a fast cloud droplet probe (FCDP, SPEC Inc., Boulder CO). To minimize artifacts due to droplet shattering on the aerosol sampling inlet, we exclude aerosol measurements inside clouds (i.e.,  $\text{LWC} > 10^{-3} \text{ g m}^{-3}$ ) from our analysis. In addition, to reduce the potential impact of airport emissions and account for differences in aerosol properties over Bartlesville, the analysis only considers measurements collected at least 12 minutes after taking off and before landing at the airport.

### 3 Results and discussion

#### 3.1 Air mass back trajectory analysis

Using the vertical aircraft profiles of potential temperature and LWC, we calculated the BL heights during the spring and summer IOPs (for flight days only), and they are  $1190 \pm 390$  m and  $1110 \pm 570$  m (AGL), respectively. To understand the air mass origin and its impact on the vertical profiles of aerosols, we calculated the 10-day back-trajectories of air masses arriving at three altitudes (200, 1000, and 1800 m, representing lower BL, upper BL, and lower FT) above the SGP during the G-1 flight days using the Hybrid Single-Particle Lagrangian Integrated Trajectory (HYSPLIT) version 4 model (Stein et al., 2015). The back trajectories were simulated with a 6-hour time step using the National Center for Environmental Prediction (NCEP) Global Data Assimilation System (GDAS) meteorological data as input. A cluster analysis of the trajectories was then performed (Abdalmogith and Harrison, 2005) for each IOP and arriving altitude (Fig. 3). The northern plains of the SGP are



130 mainly grassland and cropland (Trishchenko et al., 2004), and therefore could generate weak emissions from biogenic processes and wildfires. There are no major cities west of SGP towards the Rocky Mountains, suggesting that aerosols observed at the SGP may be impacted by biogenic emissions or wildfires from the west. Air mass originating from the south generally travels over more populated regions and metropolitan areas such as Houston, Dallas, and Oklahoma City, which is largely influenced by anthropogenic emissions. Air mass originating from the east likely bring emissions from deciduous and mixed forests in northern Arkansas, Missouri, and southern Illinois. Apart from air mass transport, the aerosol properties at the SGP are also influenced by local agricultural emission from the surrounding cropland and pasture and industrial emissions from coal-fired power plants (Liu et al., 2021; Wang et al., 2006).

140 Similar to previous ground-based observations (Liu et al., 2021; Parworth et al., 2015), the air mass arriving at the surface of the SGP (200 m) mainly originates from north during the spring IOP and from south and east during the summer IOP (Figs. 3a and 3d). Also, the short trajectory from the east reflects slower wind speeds from the forests during the summertime. This difference may lead to a higher mass of aerosols and less oxidized organic aerosols during the summer (Liu et al., 2021). The back trajectories arriving at the upper BL (1000 m) are similar to those arriving at the surface during the summer IOP (Figs. 3d and 3e), indicating a similar source of aerosols in the BL. However, during spring, the upper BL showed a stronger influence of air mass arriving from the south and west (50%, Fig. 3b) compared to the surface (21% from the south, Fig. 3a). This can potentially lead to different aerosol dynamic processes (such as NPF) in the upper BL. The air mass arriving at the lower FT (1800 m) for the spring IOP is mostly coming from the north to the west (Fig. 3c), while that for the summer IOP still showed a strong influence of air mass coming from south and east (52%, Fig. 3f). The north and west air mass arriving at the lower FT in spring potentially leads to more aged biomass burning aerosols in the lower FT. Regarding the vertical motion of the air mass, air mass arriving at 200 m above the SGP is influenced by the air mass traveling at higher altitudes (>1000 m) due to synoptic-scale subsidence over many days. Long-range transport of aerosols may occur under such situations (Wang et al., 2006), but the influence of this air mass on ground observations is also largely subject to the coupling between BL and FT.

155 Overall, during the spring IOP of the HI-SCALE campaign, the prevailing air mass at the SGP originates from the north to west, while during the summer IOP, it is predominantly from the south to east. Fire season climatology shows that, in general, there are stronger fire activities in late spring and summer to the north and west of SGP, which coincides with the warmest and driest conditions, together with wind events and dry lightning potential, while there is a much weaker fire activity to the southeast of SGP in late summer, especially from August to September (NWCG, 2021). Therefore, the difference in the back trajectories during spring and summer can explain the higher CO concentration during the springtime (Fig. S1a), which is an indicator of biomass burning (Liu et al., 2021). Biomass burning also generates precursors for the formation of O<sub>3</sub>, potentially leading to a higher springtime O<sub>3</sub> concentration (Fig. S1b). SO<sub>2</sub> profiles show higher concentrations during summer (Fig. S1c), which may be caused by the air mass influenced by anthropogenic emissions from the south. The power plants located east, south, and southeast of SGP (within 45 km of the SGP observatory) may also contribute to the SO<sub>2</sub> concentrations (Wang et

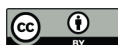

al., 2006). SO<sub>2</sub> is a key precursor of NPF, which at the same time, depends on the concentration of pre-existing aerosols and other meteorological parameters (Section 3.3.1).

### 3.2. Aerosol properties over the SGP

#### 165 3.2.1. Vertical profiles of aerosol size distributions

The vertical profiles of aerosol size distributions measured during the spring and summer IOPs are shown in Fig. 4. The size distributions show strong vertical heterogeneity and strong seasonal variability. For both seasons, the aerosol concentrations at the surface are the highest due to surface emissions. However, the dominant size of these aerosols during summer (~ 100 nm) is larger than that during spring (~ 30 nm), which is likely a result of enhanced condensational growth due to stronger volatile organic compounds (VOCs) emission and secondary organic aerosols (SOA) formation in summer (Liu et al., 2021). Additionally, the more abundant gaseous precursors can promote aqueous chemistry in cloud droplets, which accumulate the mass and increase the size of the accumulation-mode aerosols (Wang et al., 2007). The concentration of aerosols below 30 nm in the BL (e.g., below 1000 m) during spring is higher than that during summer, which may be caused by stronger NPF resulting from reduced condensation sink in spring. In the summer BL, the mode size of the aerosols gradually increases with altitude due to aerosol dynamics such as cloud processing (aqueous reaction and coalescence scavenging) and condensational growth. Due to the larger size of the aerosols that facilitates cloud droplet activation, the summertime size distributions show a Hoppel minimum (the average particle size at which particles become cloud condensation nuclei) of around 90 nm in the upper BL (600 to 1500 m) because of cloud processing (Fig. 4b). The in-cloud scavenging also removes aerosols and smaller cloud droplets, leading to a lower aerosol concentration in the higher altitudes of the BL. In the FT, aerosols are distributed in layers due to long-range transport events. However, the concentration of the transported aerosols is higher in spring, likely due to the more dominant air mass arriving from the west that is associated with wildfires, also as indicated by the higher CO mixing ratio in Fig. S1a. The influence of long-range transport aerosols is also discussed in the case study in Section 3.4.4.

To quantify the vertical heterogeneity of the aerosols, we integrated the FIMS-measured aerosol size distributions in different size ranges. We calculated the concentrations of aerosols in size ranges of 10 to 20 nm, 20 to 100 nm, and above 100 nm to qualitatively study the properties of nucleation mode, Aitken mode, and accumulation mode aerosols. Strictly speaking, the Aitken mode and accumulation mode aerosols are separated by Hoppel minimum (not 100 nm), which is dependent on aerosol properties and meteorological conditions. The nucleation mode should also include particles with sizes below 10 nm. However, due to the high concentration of aerosols at the surface, a clear Hoppel minimum could not be observed for most of the flights. The FIMS is also limited to the measurement of particles above 10 nm. Therefore, for simplicity, we use  $N_{10-20}$ ,  $N_{20-100}$ , and  $N_{>100}$  interchangeably with nucleation mode, Aitken mode, and accumulation mode aerosols. We also use  $N_{>10}$  to represent total particle concentration.





**Figure 5** shows the vertical profiles of particle number concentrations ~~normalized to standard temperature and pressure~~ (STP, 195 273.15 K and 101.325 kPa). The total aerosol concentrations for both seasons are similar ( $1.0 \times 10^3$  to  $5.0 \times 10^3$   $\text{cm}^{-3}$ , **Fig. 5a**), with summertime concentration moderately higher in the BL and springtime concentration moderately higher in the FT. The variation of the  $N_{>10}$  in the same altitude bin during spring is larger compared to summer, resulting from the **intense but sporadic NPF events during spring**, especially in the upper BL. This can also be indicated by the mean values of  $N_{10-20}$  being outside the 25th to 75th percentile box at altitudes below 1000 m (**Fig. 5b**). During summer, there is a larger variation of  $N_{>100}$  in the same altitude bin compared to that of spring (**Fig. 5d**); however, the influence of this variation on the variation of  $N_{>10}$  is small 200 due to the relatively small contribution of  $N_{>100}$  to  $N_{>10}$ . At the same time, the relatively small variation of  $N_{>10}$  during summer is caused by the weaker NPF during summer. The **more consistent source of the air mass from southeast** (**Fig. 3**) during summer also leads to a more consistent background aerosol condition. A study at the SGP shows that the summertime air mass pathways were primarily from the same direction (southerly), potentially resulting in lower variability in observed aerosol properties 205 (Andrews et al., 2011). Moreover, a number of studies documented episodically high concentrations of aerosols at the SGP during the spring season due to agricultural and wildfire sources in the area, as well as the influx of biomass-burning aerosols from different regions across North America (Pepler et al., 2000; Wang et al., 2006). Therefore, these results also suggest the importance of seasonal synoptic-scale variability on aerosol properties (~~such as aerosol size, composition, and hygroscopicity~~) and potential aerosol-cloud interactions by influencing the CCN activity. A recent study analyzing the long-term CCN activity 210 at the SGP shows that aerosols ~~originating from~~ various locations (e.g., Central America, the Gulf of Mexico, and the west) have very different accumulation mode aerosol concentrations and hygroscopicity (Patel and Jiang, 2021). However, as indicated by the study, particle size is still the most critical factor influencing the ability of aerosols to activate, whereas the effect of chemical composition was secondary.

215 A breakdown of the total aerosol concentration into different size modes shows that, in the BL,  $N_{10-20}$  is higher during the spring (**Fig. 5b**), while  $N_{>100}$  elevates in **summer** (**Fig. 5d**). Springtime  $N_{10-20}$  is impacted by a few intense, but **sporadic NPF** events. The high  $N_{10-20}$  extends to the upper BL ( $\sim 1000$  m), which could be explained by the upward mixing of the surface air, but at the same time, suggesting that NPF events may occur directly in the upper BL. Indeed, NPF events at different altitudes were observed in multiple research flights, and a few example cases are discussed in **Section 3.3.1**. The higher  $N_{>100}$  220 in summer is partly due to growth by condensable vapors transported from anthropogenic sources ~~south~~ and biogenic sources east of the SGP (Liu et al., 2021). At the same time, because the summertime size distribution shows a Hoppel minimum (**Fig. 4b**) and most particles above 100 nm are in the accumulation mode, the aqueous phase chemistry plays a role in increasing  $N_{>100}$  as well. These accumulation mode aerosols also serve as condensation and coagulation sink for nucleating vapors and newly formed particles, reducing the concentration of nucleation mode aerosols. In the FT, there are higher concentrations of 225 Aitken mode aerosols in spring than in summer, most likely resulting from long-range transport events (**Section 3.3.4**).



230 The aerosol concentrations in different modes show a vertical gradient, where the concentration at the surface is the highest. This may be due to the stronger emission at the surface, but the low BL heights observed during several research flights can also contribute to a higher average concentration of aerosols near the surface. To exclude the influence of BL height in analyzing the vertical gradient of aerosol concentrations, we examined the particle concentrations as a function of normalized altitude,  $z/z_0$ , where  $z$  is the altitude ~~in AGL~~ and  $z_0$  is the BL height ~~(AGL)~~. The particle concentrations are first binned and averaged using the specific BL height for each flight, and then combined for the entire campaign (**Fig. S2**). Comparing **Fig. S2** against **Fig. 5**, we can find that the vertical gradient of aerosol concentrations, especially near the surface, is greatly reduced when concentrations are plotted against normalized altitude, suggesting that BL height and atmospheric stability strongly influence the vertical distribution of aerosols. Overall, aerosol concentrations become lower in the upper BL ( $0.75 < z/z_0 < 1.0$ ) due to in-cloud scavenging.  $N_{>10}$  and  $N_{20-100}$  are relatively constant in the lower BL ( $z/z_0 < 0.75$ ), while  $N_{>100}$  is higher near the surface, potentially due to the faster growth by the more available condensing vapors at the surface or more efficient removal by clouds at lower altitudes in the BL.  $N_{10-20}$  has larger values in mid to upper BL, especially near  $z/z_0 \approx 0.65$ , again highlighting the occurrence of NPF in the upper BL and their potential contribution to aerosol population over the SGP.

### 240 3.2.2. Vertical profiles of aerosol chemical composition

The chemical composition of the non-refractory aerosols measured by the HR-ToF-MS is shown in **Fig. 6**. The aerosol mass is dominated by organics and sulfates for both seasons (>75%). Except for nitrate, all other components have higher concentrations during summer. The higher nitrate concentrations during spring are likely driven by the **lower spring temperatures stabilizing nitrate aerosols** (Liu et al., 2021; Parworth et al., 2015). Ammonium is likely associated with agricultural emissions. The increased levels of organics during the summer season can be attributed to biogenic emissions originating from the east of the SGP, while the higher sulfates concentration is a result of the transportation of anthropogenic emissions from the **south of the SGP**. Moreover, the previous study by Xu et al. (2015) **showed that the formation of isoprene SOA is correlated with sulfate concentration due to the interactions between biogenic and anthropogenic emissions, which explains the increase of both organics and sulfates in the summer**. Although the organics and sulfate aerosol mass ratios are similar in spring and summer at SGP, the detailed chemical compositions are different. The study by Liu et al. (2021) showed that despite the higher organic aerosol mass in summer, these organics are **less oxidized** than in spring, as indicated by the O:C and H:C ratios. The lower oxidation level in summer is likely due to (1) the SOA formation was more dominated by local biogenic emissions, and these aerosols have a **shorter residence time in summer** than in spring before being transported to the SGP, (2) **different VOC species contributing to aerosol formation in spring and summer**, and (3) the more abundant biogenic VOCs in the summer were not transformed into a higher-oxygenated form in the aerosol phase, either due to radical chemistry, oxidants, or their residence time in the atmosphere. The chemical composition analysis also showed that the impact of biomass burning on the organic aerosols is low during summer. The higher oxidation level in spring may also explain the stronger NPF events since highly oxygenated molecules can contribute to NPF due to their low volatility (Liu et al., 2021). The more



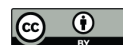

abundant fresh less-oxidized VOCs (such as isoprene) in the summer are reported to suppress NPF (Lee et al., 2016; Heinritzi  
260 et al., 2020), which agrees with our observations in this study (**Fig. 5b**).

Regarding the vertical distribution of the aerosol chemical composition, all species show lower concentrations at altitudes  
above 2000 m due to the weaker impact from surface emission and reactions. Similar to the analysis of aerosol concentrations  
(**Figs. 5 and S2**), we plotted the aerosol chemical composition against normalized altitude in **Fig. S3**, which shows a relatively  
265 uniform distribution of aerosol mass in the lower BL ( $z/z_0 < 0.75$ ). The in-cloud scavenging and the subsequent precipitation  
~~or drizzle~~ process can reduce aerosol mass concentrations in the upper BL. In spring, sulfate and organics concentrations are  
moderately elevated at higher altitudes, likely due to long-range transport events. Both ammonium and nitrate concentrations  
increase from the surface to  $\sim 1000$  m, likely resulting from the lower temperature that stabilizes the ammonium nitrate  
aerosols. At the same time,  $\text{NO}_x$  is more abundant farther from the surface because there are few ground-level sources at the  
270 SGP, and  $\text{NO}_x$  are mostly transported from other regions.

As discussed above, the aerosol properties at the SGP are largely influenced by aerosol dynamics and transport processes.  
Aerosol dynamics include NPF (**Section 3.3.1**), particle growth (**Section 3.3.2**), and cloud processing (**Section 3.3.3**), which  
alter the aerosol size distributions within the BL. Both vertical and horizontal transport affect the vertical profiles of aerosols.  
275 The vertical profile of aerosols is affected by the boundary layer stability (**Section 3.4.1**), where the mixing of the residual  
layer and the nocturnal boundary layer results in the change of aerosol properties. At the same time, entrainment (**Section  
3.4.2**) is a slow process that exchanges aerosols between the upper BL and lower FT. During the HI-SCALE campaign, we  
also observed more rapid vertical transport due to deep convective downdrafts (**Section 3.4.3**), which bring high concentrations  
of ultrafine particles from the FT to the surface. Long-range transport (**Section 3.4.4**) is an example of horizontal transport that  
280 can bring aged aerosol layers to specific altitudes of the atmosphere. Examples of these aerosol dynamics and transport  
processes are introduced and discussed as follows.

### 3.3. Aerosol dynamics processes influencing the vertical distributions of aerosols

#### 3.3.1. New particle formation

Similar to previous studies at the SGP (Marinescu et al., 2019; Wang et al., 2006; Chen et al., 2018), several NPF events were  
285 also observed onboard the G-1 during the HI-SCALE campaign. These newly formed particles and their subsequent growth  
may be a significant contributor to CCN. Generally, the occurrence of NPF requires sufficient gaseous precursors, a high  
actinic flux for photo-oxidation reactions, a low temperature to stabilize the newly formed particles, and a low concentration  
of pre-existing aerosols (i.e., a low condensation and coagulation sink) (Kuang et al., 2009; Kuang et al., 2008; Cai and Jiang,  
2017; Zheng et al., 2021; Corral et al., 2022). There is a weak positive correlation between the  $\text{SO}_2$  mixing ratio and the  
290 concentration of nucleation mode aerosols ( $N_{10-20}$ ) for most of the flights, showing that the NPF events at the SGP are possibly



linked with sulfuric acid (**Fig. S4a**). However, the total surface area concentration ( $S_{\text{tot}}$ , which is approximately equivalent to condensation sink, **Fig. S4b**) and ambient temperature ( $T_{\text{amb}}$ , **Fig. S4c**) also play roles in promoting NPF. Since all the HI-SCALE campaign flight measurements were conducted during the daytime, we could not directly compare the NPF occurrence as a function of actinic flux. However, ground observations during the HI-SCALE campaign show that NPF occurrence is a strong function of solar radiation and has a clear diurnal cycle (Marinescu et al., 2019).

Although the concentration of the nucleation mode aerosols is the highest near the surface of the SGP (**Fig. 5**), NPF does not necessarily occur only near the surface. By measuring the vertical profiles of the aerosol concentration and size distributions, we found that out of the 38 research flights, 9 flights observed NPF near the surface (below 600 m AGL, 1 flight in spring IOP and 8 flights in summer IOP), 7 flights observed NPF in the upper BL (above 600 m AGL, 4 flights in spring IOP and 3 flights in summer IOP), and 2 flights observed NPF in the lower FT (above the BL, 1 flight in spring IOP and 1 flight in summer IOP) over the SGP. Since these NPF events generate high concentrations of nucleation mode aerosols in a short time scale (sometimes shorter than the mixing time in the BL), they can significantly influence the vertical distribution of aerosol properties. For example, Chen et al. (2018) found that it took  $\sim 0.5$  to  $1.0$  h to vertically mix newly formed particles from  $\sim 400$  m above the ground to the surface. This mixing time will be longer for NPF events in the upper BL, and it also depends on the stability of the BL (Marinescu et al., 2019). In this study, we used the criteria of  $N_{>3}/N_{>10} > 1.2$  (monitored by the two CPCs with different cut-off sizes) and  $N_{10-20} > 500 \text{ cm}^{-3}$  (monitored by the FIMS) to identify NPF events within each altitude bin. Note that here we included the criterion regarding  $N_{10-20}$  to show the NPF's influence on the measured aerosol size distributions and their evolution in the vertical profiles. However, in some NPF cases, the newly formed particles may not grow sufficiently fast to be detected in the 10 to 20 nm range. Therefore, our criteria may be relatively strict for identifying NPF events. Cases of NPF events occurring at different locations of the atmosphere are discussed below.

#### *NPF near the surface of the SGP*

An example of a NPF event near the surface of the SGP on September 11, 2016, is shown in **Fig. 7**. A relatively stable BL with a height of  $\sim 900$  m is indicated by the LWC and the change of aerosol concentration (**Fig. 7a**). The potential temperature profile also shows a gradual temperature inversion below 800 m, limiting the transport of aerosols in the BL. Elevated concentrations of nucleation mode aerosols and the concentration of aerosols between 3 and 10 nm ( $N_{3-10}$ , calculated by taking the difference between CPC 3025A and 3010) are observed at the altitude below 400 m (**Fig. 7b**). In the NPF altitude range, there is a higher mixing ratio of  $\text{SO}_2$  near the surface ( $\sim 0.3$  ppb) compared to higher altitudes ( $< 0.1$  ppb), suggesting that the NPF events may be initiated by sulfuric acid. However, a relatively high concentration of pre-existing accumulation-mode aerosols is observed ( $\sim 600 \text{ cm}^{-3}$  in the BL), which led to a high total surface area concentration of the aerosols ( $S_{\text{tot}}$ ), reaching around  $75 \mu\text{m}^2 \text{ cm}^{-3}$ . A low surface area of pre-existing aerosols is generally required for NPF under clean environments. For example, over the Eastern North Atlantic, NPF does not occur when  $S_{\text{tot}}$  is above  $10 \mu\text{m}^2 \text{ cm}^{-3}$  (Zheng et al., 2021). The NPF occurrence under a high  $S_{\text{tot}}$  is likely a result of the abundance of nucleating precursors.

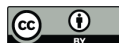

325

### *NPF in the upper BL*

During the HI-SCALE campaign, a considerable number of NPF events occurred in the upper BL, which could not be captured by the ground-based measurements. An example case on May 14, 2016, is shown in **Fig. 8**. The vertical profile of the potential temperature, LWC (**Fig. 8a**), and CO mixing ratio (**Fig. 8c**) show relatively well-mixed BL with a height of  $\sim 1000$  m. Intensive NPF occurred in the upper BL between 600 and 1000 m, as shown by the high concentration of nucleation mode aerosols (**Fig. 8d**) and  $N_{3-10}$  (**Fig. 8b**). The NPF occurred in the upper BL, where the pre-existing aerosols may be removed through cloud processing and precipitation (occurred at 19:20 local time on the previous day), where a  $S_{\text{tot}}$  of around  $50 \mu\text{m}^2 \text{cm}^{-3}$  is observed. Since NPF events generally occur during the daytime, the upper BL may be the residual layer developed above the nocturnal boundary layer. Due to the formation of the stable nocturnal boundary layer, the emission from the surface, including the gaseous precursors for NPF, will have less impact on the residual layer. As the BL gradually mixes, the gaseous precursors are transported to the upper BL, where the lower temperature and the higher actinic flux at the cloud level may promote the NPF, similar to the findings in the recent work modelling the vertical profile of NPF at SGP (O'Donnell et al., 2023). However, it should be noted that, in this case, the **SO<sub>2</sub> concentration at the cloud level is lower** than that near the surface. It may be because of the following reasons: (1) the low  $S_{\text{tot}}$  plays a dominating role in promoting NPF, and a SO<sub>2</sub> mixing ratio of 0.5 ppb is already sufficient for initiating NPF; (2) SO<sub>2</sub> was already depleted in the upper BL due to the NPF event; (3) different nucleating precursors, such as amines and ELVOCs, were involved in this NPF event.

As shown in **Fig. 8d**, after the particles are formed in the upper BL, they grow to larger sizes as they transport to the surface. These newly formed particles can grow to sizes capable of acting as CCN and contribute to cloud formation. Previous balloon-borne measurements over the SGP observed similar NPF events in the upper BL, reaching an altitude of around 400 m (Chen et al., 2018). Our measurements show that NPF events may occur at even higher altitudes in the BL and influence the measurement at the surface. Depending on the atmospheric stability, these newly formed particles may take 0.5 to several hours to transport to the surface (Chen et al., 2018). The study on the long-term monitoring of aerosol size distributions at the SGP site examined the correlation between the BL height and the occurrence of high concentrations of particles between 7 and 30 nm ( $N_{7-30\text{nm}}$ ), which is an indicator for NPF (Marinescu et al., 2019). The study found that weekly periods with more consistent diurnal cycles in  $N_{7-30\text{nm}}$  were associated with deeper BLs that extended into the late afternoon and evening hours, suggesting that BL development may play an important role in NPF events observed at the surface. These results concerning the NPF and BL structure highlight the importance of directly measuring the vertical profiles of aerosols and trace gas properties for a better understanding of NPF mechanisms. Since most climate simulations use data collected from ground observation, NPF occurring in the upper atmosphere and their influence on the surface measurements need to be examined in more detail.

### *NPF in the lower FT*



NPF occurs regularly in the FT due to the low surface area of pre-existing aerosols, colder temperatures, and higher actinic flux (Bianchi et al., 2016; Williamson et al., 2019). During the HI-SCALE campaign, limited by the altitude of the G-1 aircraft (generally below 2500 m), observations were made in the lower FT, where NPF was not as frequent as that in the BL. The intensity of the NPF was also lower, as shown in the example case on May 13, 2016 (**Fig. 9**). In this event, NPF was observed between 1800 and 2000 m (**Figs. 9b** and **9d**), which is above the BL with a height of around 1000 m determined based on the potential temperature profile (**Fig. 9a**). The NPF event coincided with a minor increase in the SO<sub>2</sub> mixing ratio (~ 0.3 ppb, **Fig. 9c**), showing that the NPF may be initiated by sulfuric acid.  $S_{\text{tot}}$  at the NPF layer (~ 55  $\mu\text{m}^2 \text{cm}^{-3}$ ) was comparable to the surface (~ 80  $\mu\text{m}^2 \text{cm}^{-3}$ ), suggesting that the colder temperature and the higher actinic flux may play a more significant role in this NPF event. In addition, compared to the NPF events in the BL (**Figs. 7** and **8**), the concentration of the newly formed particles in the lower FT is also lower. In order to have an impact to cloud formation, these aerosols need to be first transported into the BL via entrainment or convective downdraft (**Sections 3.4.2** and **3.4.3**), and further grow to CCN-relevant sizes, which are more complex compared to the processes involving newly formed particles in the BL that can readily grow and contribute to CCN. Therefore, the climate impact of these particles formed in the lower FT over the SGP may be small.

### 3.3.2. Condensational growth

The growth of nucleation mode and Aitken mode aerosols is commonly observed at the SGP (Hodshire et al., 2016; Marinescu et al., 2019; Wang et al., 2006). The growth of these aerosols is also shown in **Fig. 8d**, where recently formed particles in the upper BL of below 10 nm grow to ~ 20 nm as they are transported to the surface of the SGP. The particles can grow through different dynamic approaches, including coagulation, condensation, and volume-controlled processes (e.g., the aqueous reaction within hydrated particles and gas/particle partitioning). The growth of these particles by coagulation is unlikely since the characteristic coagulation time ( $\tau = 2/\beta N$ ,  $\beta$  is the coagulation coefficient and  $N$  is total aerosol concentration) is more than 80 hours (Friedlander, 2000), much longer than the mixing time in the BL. A previous study at the SGP using size-dependent growth law analysis shows that volume-controlled processes dominated the aerosol growth above 60 nm, and sulfate accounts for 50% to 72% of the increase in aerosol volume concentration, with the rest likely due to secondary organic species (Wang et al., 2006). The size-dependent growth rate analysis shows that particle growth below 60 nm is likely influenced by condensation (Wang et al., 2006). A more recent study by Hodshire et al. (2016) measured the gas and particle compositions during NPF events at the SGP in spring 2013, and suggested that the growth of the newly formed particles from 10 to 20 nm can be explained by either sulfuric acid-forming salts with atmospheric bases (either ammonia or amines), or the condensation of primarily nonreactive organics, or a combination of these two. The study highlights that in addition to sulfuric acid, ELVOCs are also very important for growth in the rural setting of the SGP.

### 3.3.3. Cloud processing

Cloud processing converts CCN to cloud droplets, reducing the number of aerosols through scavenging and enlarging the size of aerosols after cloud droplets are evaporated. At the same time, aqueous reactions in the cloud droplets accumulates mass in



the droplet, also enlarging aerosol size upon evaporation (Wang et al., 2007). An example of how cloud processing influences the vertical profiles of aerosols is shown in **Fig. 10**. The research flight on May 1, 2016 observed a decoupled BL structure with a lower surface layer up to 800 m and an upper layer reaching 1500 m. Inside the surface layer, the aerosol size distribution is bimodal and independent of altitude. Inside the upper layer, cumulus clouds are distributed between the altitude of 1000 and 1500 m, and the concentration of accumulation mode aerosols is significantly reduced because of coalescence scavenging by the cumulus clouds. The lower concentration of accumulation mode aerosol concentration indicates that surface measurements may overestimate the concentration of CCN that are relevant for cumulus cloud formation when the BL is decoupled. The concentration of Aitken mode aerosols also exhibits a decreasing trend with altitude due to interstitial coagulation with cloud droplets. We notice that the size of the accumulation mode aerosols increased inside the upper BL (165 nm) compared to that near the surface (150 nm), as shown by the black line in **Fig. 10b**. This increase in the accumulation mode aerosol size is likely due to the aqueous phase reaction (sulfate production) in cloud droplets, which was also observed in a flight measurement campaign at the SGP site in 2003 (Wang et al., 2007). Measurements and model calculations in that study show that the aqueous phase reaction is sufficiently fast to overcome the homogenization resulting from turbulent mixing, leading to a vertical heterogeneity in aerosol size distributions. Coalescence scavenging of aerosols in the cloud layer also contribute to particle mass accumulation and particle size increase upon evaporation of the cloud droplets. The accumulation mode aerosol size increase is shown in the mean size distribution over summer but not in spring (**Fig. 4**), which could be due to the higher SO<sub>2</sub> concentration (**Fig. S1c**) and stronger aqueous phase oxidation in summer. Note that the cloud droplet measurement during the HI-SCALE campaign also shows that droplet size during summer is approximately 2 μm larger than that during spring, although the cloud frequency was less during summer (Fast et al., 2019). Therefore, it is likely that the difference in the type of clouds can also lead to different properties of the accumulation-mode aerosols.

### 3.4. Transport processes influencing the vertical distributions of aerosols

#### 3.4.1. Mixing in the boundary layer

Since the aerosols travel with the air mass, the vertical distribution of aerosols is largely dependent on atmospheric stability. The HI-SCALE campaign contains several same-day flights during summer to examine the temporal variation of aerosols over the SGP, where the influence of BL structure on the vertical distribution of aerosols can be examined. **Figure 11** shows the measurement on September 4, 2016 conducted from 9:00 to 12:00 local time (**Fig. 11a**), and then from 14:00 to 15:00 local time (**Fig. 11b**). A stable BL can be observed during the morning measurements as indicated by the inversion of the potential temperature (**Fig. 11a**). Cumulus clouds can be observed at the altitudes of 1700 to 2100 m, which separates the BL and FT. At this time, the nocturnal boundary layer developed overnight has not been affected significantly by surface warming, and therefore, the surface emission is largely constrained near the ground, leading to a high concentration of aerosols at around 100 nm (~ 5100 cm<sup>-3</sup>, **Fig. 11b**). The upper BL (1000 to 2000 m), which corresponds to the altitude range of the residual layer developed overnight, has a significantly lower concentration of aerosols (~ 1500 cm<sup>-3</sup>) and a larger accumulation mode aerosol



size compared to the surface, likely due to the lack of emission source and cloud processing that removes and conditions pre-existing aerosols. This difference in concentration leads to a large gradient in aerosol concentration.

425

The flight measurement in the afternoon shows an evolved BL structure, where the air below the altitude of 1000 m is relatively well mixed, as indicated by the relatively constant potential temperature (**Fig. 11c**). This mixing in the BL led to a more uniform distribution of the aerosol size distribution in the lower BL, and the total concentration of aerosols varied between 4000 and 5200 cm<sup>-3</sup> within the BL at different altitudes. In addition to the accumulation mode aerosols, nucleation mode and Aitken mode aerosols emerge in the lower BL, likely due to NPF events or air mixing from another location. The mode size of the accumulation mode aerosols changed from 110 nm in the morning to 130 nm in the afternoon, potentially due to particle growth in the BL, although the influence of air mass change cannot be ruled out. The slow growth of the accumulation mode aerosols compared to the nucleation mode and Aitken mode aerosols is caused by their larger surface area, which requires a larger mass of condensing vapors to grow the particle size. In the upper BL where cumulus clouds are located (> 1200 m), the aerosol size distributions measured in the afternoon are similar to those measured in the morning (**Figs. 11b and 11d**), indicating that the BL is still not completely well mixed at this time. The results show that, due to the daily evolution of the BL structure, the aerosols at the cloud level over the SGP may not be strongly related to the aerosols monitored at the surface. This time-dependent mixing of aerosols may further complicate our understanding of aerosol-cloud interactions.

430

435

### 3.4.2. Entrainment transport

Entrainment at the top of BL is a slow process that exchanges the air between the BL and FT, affecting the vertical distribution of aerosols in the upper BL and lower FT. Generally, due to the higher concentration of aerosols in the BL at the SGP (especially in summer, as shown in **Fig. 4b**), entrainment brings cleaner FT air to the BL and dilutes the aerosols in the BL. Such an entrainment process can be observed in **Figs. 11a and 11b** (case also shown as an example for mixing in the BL), where the higher concentration of accumulation mode aerosols emitted from the surface was transported across the cloud top into the lower FT. The continuous mode size of the accumulation mode aerosols through 1250 to 2500 m show that the aerosols in the upper BL and lower FT are related. The aerosols transported into FT are less influenced by cloud scavenging and other sinks and, therefore, have a longer lifetime in the atmosphere and may influence other locations through long-range transport. During the HI-SCALE campaign, there are also events where high concentrations of FT aerosols are entrained into cleaner BL, and an example case on April 25, 2016 is shown in **Figs. 12a and 12b**. In this event, the aerosols at around 50 nm in the lower FT above 1200 m are entrained into the cleaner upper BL, and the entrained aerosols further grow as they transport to the surface.

445

450

The flux of aerosols transported through entrainment can be estimated based on the concentration gradient built between the lower FT and upper BL and the entrainment velocity. The entrainment flux  $F_{x,ent}$  can be estimated as

$$F_{x,ent} = w_e(N_{FT} - N_{BL})$$

455





where  $w_e$  is the entrainment velocity, and  $N_{FT}$  and  $N_{BL}$  are the average concentration of aerosols in the lower FT and upper BL, respectively (Wang et al., 2021). The value of  $w_e$  largely varies by location, and a recent study at SGP reported a mean entrainment velocity of  $0.74 \pm 0.15 \text{ cm s}^{-1}$  (Albrecht et al., 2016). Taking into account the seasonal variation of the average BL height (**Section 3.1**), we further calculated the  $N_{FT}$  and  $N_{BL}$  based on the average aerosol concentration 200 m above and  
460 below the top of the BL. The influx of  $N_{>10}$  from the FT to BL due to entrainment is estimated as  $-3.25 \pm 0.66 \times 10^7 \text{ cm}^{-2}$  per day and  $-7.56 \pm 1.53 \times 10^7 \text{ cm}^{-2}$  per day for spring IOP and summer IOP, respectively, based on the entrainment velocity determined by Albrecht et al. (2016). Overall, entrainment serves as a sink of aerosols in the BL, which dilutes the aerosols in the BL of the SGP. Entrainment dilutes BL aerosols more effectively in the summer G-1 sampling periods than in spring G-1 sampling periods due to the larger difference in aerosol concentrations across the top of the BL.

### 465 3.4.3. Convective transport

Mid-latitude mesoscale convective systems (MCS) are often associated with frontal intrusions that can transport air mass horizontally. Transport within convective clouds can also exchange aerosols between the FL and BL locally and episodically, in contrast to more prevalent entrainment. Data collected from the HI-SCALE campaign show that deep convection events affected aerosol properties at the SGP, potentially through both horizontal and vertical transport processes. Here, deep  
470 convection is characterized by a strong equivalent radar reflectivity factor ( $Z > 50 \text{ dBZ}$ ) and intense mean Doppler velocity values that are indicative of strong vertical air velocities ( $> 5 \text{ m s}^{-1}$ ) in the convective core, as estimated by the ARM Radar Wind Profiler (RWP). A recent study on the characteristics of midlatitude MCS suggested that the squall lines associated with mature convection over the SGP are often characterized by strong precipitation-driven downdrafts originating at altitudes higher than 6 km (Wang et al., 2019). An example MCS from September 9 to September 10, 2016 is shown in **Figs. 13** and  
475 **14**. On this day, a squall line passage with cloud (echo) top heights exceeding 12 km is observed between 21:30 and 22:00 local time on September 9, followed by stratiform precipitation from 22:30 on September 9 to 2:00 on September 10 (**Figs. 13a and 13b**). In **Fig. 13b**, note that a positive mean Doppler velocity indicates downward motion, and a negative mean Doppler velocity indicates upward motion. Those estimates combine contributions from the air motions and hydrometeor fall speeds. For this example, one marker for the intensity of drafts in these core regions is evident in mean Doppler velocity values  
480 near and above the melting layer that exceed  $10 \text{ m s}^{-1}$ , well beyond expected hydrometeor fall speeds for those altitudes and indicative of coherent downdrafts.

This deep convective event is accompanied by significant decreases in aerosol concentrations (**Fig. 13c**) and equivalent potential temperature ( $\theta_E$ , **Fig. 13d**), and changes in surface wind speed and direction (**Fig. 13e**). The decrease of  $\theta_E$  is a  
485 separate indicator of the convective downdraft, which vertically transports air mass from the FT to the BL. Its decrease by 15 K is  $\sim 15$  minutes before precipitation, associated with the advancing cold pool – downdraft outflow developed with this squall line and preceding its arrival at the SGP site. Similarly, the change of the wind direction (from south to northwest and then to the north) and wind speed (from  $\sim 5 \text{ m s}^{-1}$  to  $\sim 15 \text{ m s}^{-1}$ ) also indicates the horizontal transport of the air mass associated with



the cold pool. This combined transport process potentially leads to a change in aerosol size distributions. Before the deep  
490 convection event (10 minutes before the decrease of  $\theta_E$ ), the aerosols have an average total concentration of  $\sim 1.4 \times 10^4 \text{ cm}^{-3}$   
and a mode diameter of  $\sim 91 \text{ nm}$ . Aerosols during the deep convection (between 21:30 and 1:00) have a reduced average total  
concentration of  $\sim 2600 \text{ cm}^{-3}$  and a smaller mode diameter of  $\sim 45 \text{ nm}$ . This change in aerosol properties may be explained by  
the horizontal transport of air mass, but at the same time, the vertical transport of FT air to the BL may also contribute to the  
change in aerosol properties. Generally, FT is a source of ultrafine particles in the nucleation mode and Aitken mode due to  
495 the prevalent NPF events (Bianchi et al., 2016; Williamson et al., 2019). A study conducted in the Amazon rainforest showed  
that strong convective downdrafts and subsequent weaker downward motions in the trailing stratiform regions of MCS are  
capable of transporting ultrafine aerosols from the FT to BL (Wang et al., 2016). These vertically transported ultrafine aerosols  
can grow to CCN sizes and may affect subsequent cloud formation.

500 In this deep convection event at the SGP site, a phenomenon similar to that of the Amazon rainforest is observed, where Aitken  
mode at  $\sim 45 \text{ nm}$  emerged during the deep convection (**Fig. 13c**). The change of aerosol size distribution between 22:00 and  
1:00 may be due to the weaker air downward transport in the stratiform regions from different altitudes, but at the same time,  
may be a result of condensational growth in the BL, where precipitation removed larger particles serving a condensation sink.  
Since no flights were conducted closely before and after the deep convection event, we examined the research flight conducted  
505 between 11:00 and 13:00 on September 10, around 10 hours after the deep convection event. Back trajectory analysis shows  
that the air masses arriving at 500, 1000, and 1500 m over the SGP site during the flight sampling period agree well with the  
path of the MCS (**Fig. S5**) and wind direction (**Fig. 13e**), suggesting that the air mass sampled during the research flight  
represents the air mass impacted by the deep convection. Moreover, the the back trajectories indicate vertical air motion from  
the FT to BL. The vertical profile of aerosol size distributions (**Fig. 14**) shows the impacts of the downward transport of  
510 aerosols, where the lower FT (1000 to 1800 m) and BL (below 1000 m) aerosols are dominated by the Aitken mode aerosols,  
and the aerosol size distributions from the surface to the lower FT are continuous, suggesting that the aerosols in the BL are  
transported from the FT.

Assuming the vertical profile of aerosol size distributions measured on September 10 is the same as that during the deep  
515 convection event, we can estimate the influx of aerosols from the FT to the BL between 21:30 and 22:00 by

$$F_{x,\text{con}} = w_d(N_{\text{FT}} - N_{\text{BL}})$$

and  $w_d$  is the downdraft velocity measured by the RWP. We use the concentration of aerosols between 1000 and 1800 m to  
represent the FT aerosol concentration ( $N_{\text{FT}}$ ), which is  $1790 \pm 280 \text{ cm}^{-3}$ . The concentrations of aerosols below 1000 m are used  
to calculate the BL aerosol concentration ( $N_{\text{BL}}$ ), which is  $1540 \pm 540 \text{ cm}^{-3}$ .  $w_d$  can be estimated from the mean Doppler velocity  
520 in **Fig. 13b**, which is a summation of hydrometeor fall speed and downdraft velocity. In general, hydrometeor fall speed is  
between 6 and 8  $\text{m s}^{-1}$ . Considering this effect, since the mean Doppler velocity at the altitude of 1000 m (through the boundary  
between FT and BL) between 21:30 and 22:00 is approximately 8.4  $\text{m s}^{-1}$ ,  $w_d$  is on the order of 1  $\text{m s}^{-1}$ . Therefore, the influx



of  $N_{>10}$  from the FT to BL due to the convective downdraft is approximately  $2.50 \times 10^4 \text{ cm}^{-2} \text{ s}^{-1}$  for this event. Considering that the period of strong convective downdraft lasted for 0.5 hours (21:30 to 22:00), the total exchange of  $N_{>10}$  from the FT to BL during this period is approximately  $4.50 \times 10^7 \text{ cm}^{-2}$ , which is comparable to the absolute exchange of  $N_{>10}$  due to entrainment for a single day. Note that here, we ignored the subsequent weaker downward motions in the trailing stratiform regions of MCS between 22:00 and 2:00, which may further contribute to the flux of aerosols.

Compared to the vertical transport of these particles by entrainment mixing, which is slower but more prevalent, the deep convective downdraft process is more rapid and efficient in the vertical transport of aerosols, replenishing the BL with aerosols after wet deposition. However, most current climate models do not include this vertical transport as a source of CCN, as climate models use convective transport parameterization that does not reflect cloud-resolved properties under a high resolution. Moreover, there are not many direct measurements of these processes to confirm the impact of convective downdraft on aerosols. The frequency of deep convective events varies significantly with geographic location, and thus their contributions to CCN are unpredictable. Future work is needed to investigate further this mechanism's importance under wide geographical and seasonal conditions. Also, as shown in this studied case, it is challenging to differentiate between horizontal and vertical transport of aerosols. Research flights conducted adjacent to deep convection events or flux towers monitoring aerosol and trace gas properties may help isolate the influences of these two processes.

#### 3.4.4. Long-range transport

As shown in the vertical profiles of aerosol size distribution, the aerosol concentrations are generally higher in the BL than in the FT due to the strong emission from the surface at the SGP. However, we observed unusually high aerosol concentrations in the FT in several flight observations, which are due to the long-range transport events. Such events are more prevalent in the spring due to the dominant air mass from north to west, potentially influenced by wildfire emissions which injected aerosols to the FT. An example event of long-range transport on April 28, 2016 is shown in **Fig. 15**. The BL height is around 1000 m based on the vertical profile of CO, and it is not fully mixed, as indicated by the gradual increase of the potential temperature. Due to the insufficient mixing in the BL, a high concentration of Aitken-mode aerosols near the surface of the SGP is observed.

In the FT, the air is stratified as indicated by the monotonic increase in potential temperature. We could observe elevated concentrations of aerosols at the altitude of 1600 to 2500 m ( $\sim 3500 \text{ cm}^{-3}$ ) compared to the upper BL ( $\sim 2500 \text{ cm}^{-3}$ ). It also appears that two layers of aerosols are observed, one at the altitude of 1600 to 2200 m, and the other at 2200 to 2500 m. The lower layer is characterized by aerosols with a mode size of  $\sim 40 \text{ nm}$ , and the upper layer with a mode size of  $\sim 60 \text{ nm}$  (**Fig. 15c**). The two air layers also show distinct mixing ratios in CO (0.140 ppm in the lower layer and 0.144 ppm in the upper layer, **Fig. 15b**), as opposed to that in the boundary layer (0.135 to 0.140 ppm). We carried out back trajectory calculations using the Hysplit model (**Fig. 15d**), and the back trajectories indicate aerosol layers observed originated 10 days earlier from Northeast Asia, where fire activities were reported (**Fig. S6**). Note that the upper layer between 2200 and 2500 m showed a



broad aerosol size distribution with larger sizes, likely caused by the particle coagulation and condensation of gas phase species during the long-range transport (Mattis et al., 2003). Overall, both the vertical profiles of aerosol size distributions (**Fig. 4a**) and the back trajectory analyses (**Fig. 3**) show that long-range transported aerosols in spring play a more important role in affecting the vertical distribution of aerosols than in summer. If these transported aerosols are located near the top of the BL  
560 (unlike the aerosol layer in **Fig. 15**), they can be entrained into the BL, and further influence the CCN activities over the SGP.

#### 4. Conclusions

In this study, we present aerosol properties and meteorological parameters characterized onboard the G-1 aircraft during ~~both~~  
~~the~~ spring and summer IOPs of the HI-SCALE campaign. The key processes that drive the aerosol population in the BL are investigated by examining the variation of aerosol properties with altitude and seasonal conditions. On average, the total  
565 concentrations of aerosols ( $N_{>10}$ ) and those in the Aitken mode ( $N_{20-100}$ ) are similar in both seasons.  $N_{>10}$  decreases significantly with altitude due to the strong surface emission sources at SGP. Cloud processing in the upper BL removes aerosols by coalescence scavenging, but at the same time, grow the size of the accumulation mode aerosols through aqueous chemistry in the cloud droplets. Aerosol concentrations in the FT are higher during spring due to the long-range transport events as dominant air mass originating from north to west were potentially influenced by wildfire emissions.

570

A breakdown of the aerosol concentration based on their size ranges show that the nucleation mode aerosol concentration ( $N_{10-20}$ ) is higher in the spring, and the accumulation mode aerosol concentration ( $N_{>100}$ ) is higher in the summer. The higher  $N_{>100}$  in summer is likely due to growth by aqueous chemistry in the cloud droplets and condensation of vapors transported from anthropogenic sources south and biogenic sources east of the SGP. The higher  $N_{10-20}$  in the spring is a result of stronger NPF  
575 under a lower concentration of pre-existing aerosols, especially accumulation mode aerosols which serve as a stronger sink of nucleating vapors and newly formed particles due to their larger surface area. The sizes of the Aitken mode aerosols are very different ( $\sim 30$  nm in spring and  $\sim 50$  nm in summer), despite their similar concentrations in the BL. The larger size of these aerosols is likely a result of enhanced condensational growth due to enriched condensable organic compounds in summer. The larger size and higher concentrations of accumulation mode aerosols during summer correspond to higher mass concentrations  
580 of sulfate, organics, and ammonium. A lower concentration of nitrate in summer is likely driven by the temperature.

The vertical heterogeneity of aerosols over the SGP is affected by aerosol dynamics, including new particle formation, condensational growth, and cloud processing. It is also influenced by transport processes, including mixing in the BL, entrainment of FT air, convective transport, and long-range transport. A considerable number of NPF events were observed in  
585 the upper BL, and these newly formed particles can mix down to the surface as they grow larger and further contribute to the CCN population. The fluxes of aerosols transported by entrainment and convective downdraft are also estimated; however, more work is needed to differentiate the influences of horizontal and vertical transport processes on aerosol properties. Overall,

analyzing the vertical profiles of aerosols provides a **complete** understanding of the sources and sinks of aerosols in the atmosphere and greatly compliments ground observations. Future work on quantifying the roles of each process in more detail is needed to understand better the aerosol lifecycle, including aerosol-cloud interactions and their impact on climate.

### Data availability

All ARM datasets used in this paper are publicly available on the ARM website ([arm.gov/data](https://arm.gov/data)). The data specifically related to the HI-SCALE campaign can be found at <https://www.arm.gov/research/campaigns/sgp2016hiscale>

### Author contributions

YW, CBR, XG, JZ, JF, AM, FM, ATO, JS, SS, JT, and JW collected and analyzed the aerosol and trace gas data aboard the G-1. SEG, DW, and YW analyzed the cloud and radar data. YW and CBR prepared the manuscript with contributions from all co-authors.

### Competing interests

The authors declare that they have no conflict of interest.

### Acknowledgements

The HI-SCALE campaign was supported by the ARM Climate Research Facility and the Environmental Molecular Sciences Laboratory (EMSL) through projects 48804 and 49297, both are U.S. DOE Office of Science User Facilities sponsored by the Office of Biological and Environmental Research. We thank Dr. Tamara Pinterich for her help in the preparation and operation of the FIMS during the IOPs. This research was supported by the Atmospheric System Research (ASR) program as part of the DOE Office of Biological and Environmental Research under awards DE-SC0021256. The authors thank the G-1 flight and ground crews (M. Hubbell, C. Eveland, M. Crocker, P. Carroll, J. Ray, and R. Hone) for supporting the HI-SCALE mission. We acknowledge the use of data and/or imagery from NASA's Fire Information for Resource Management System (FIRMS) (<https://earthdata.nasa.gov/firms>), part of NASA's Earth Observing System Data and Information System (EOSDIS).

### References

- Abdalmogith, S. S. and Harrison, R. M. J. A. E.: The use of trajectory cluster analysis to examine the long-range transport of secondary inorganic aerosol in the UK, 39, 6686-6695, 2005.
- Ackerman, T. and Stokes, G.: The Atmospheric Radiation Measurement program, *Physics Today*, 56, 1-14, 2003.
- Albrecht, B., Fang, M., and Ghate, V.: Exploring stratocumulus cloud-top entrainment processes and parameterizations by using Doppler cloud radar observations, *Journal of the Atmospheric Sciences*, 73, 729-742, 2016.
- Andrews, E., Sheridan, P., Ogren, J. J. A. C., and Physics: Seasonal differences in the vertical profiles of aerosol optical properties over rural Oklahoma, 11, 10661-10676, 2011.



- Bianchi, F., Tröstl, J., Junninen, H., Frege, C., Henne, S., Hoyle, C. R., Molteni, U., Herrmann, E., Adamov, A., and Bukowiecki, N.: New particle formation in the free troposphere: A question of chemistry and timing, *Science*, 352, 1109-1112, 2016.
- 625 Cai, R. and Jiang, J.: A new balance formula to estimate new particle formation rate: reevaluating the effect of coagulation scavenging, *Atmospheric Chemistry and Physics*, 17, 2017.
- Canagaratna, M., Jayne, J., Jimenez, J., Allan, J., Alfarra, M., Zhang, Q., Onasch, T., Drewnick, F., Coe, H., and Middlebrook, A. J. M. s. r.: Chemical and microphysical characterization of ambient aerosols with the aerodyne aerosol mass spectrometer, 26, 185-222, 2007.
- 630 Chen, H., Hodshire, A. L., Ortega, J., Greenberg, J., McMurry, P. H., Carlton, A. G., Pierce, J. R., Hanson, D. R., and Smith, J. N.: Vertically resolved concentration and liquid water content of atmospheric nanoparticles at the US DOE Southern Great Plains site, *Atmospheric Chemistry and Physics*, 18, 311-326, 2018.
- Corral, A. F., Choi, Y., Crosbie, E., Dadashazar, H., DiGangi, J. P., Diskin, G. S., Fenn, M., Harper, D. B., Kirschler, S., and Liu, H. J. G. R. L.: Cold Air Outbreaks Promote New Particle Formation Off the US East Coast, 49, e2021GL096073, 2022.
- 635 Fast, J. D., Bell, D. M., Kulkarni, G., Liu, J., Mei, F., Saliba, G., Shilling, J. E., Suski, K., Tomlinson, J., and Wang, J.: Using aircraft measurements to characterize subgrid-scale variability of aerosol properties near the Atmospheric Radiation Measurement Southern Great Plains site, *Atmospheric Chemistry and Physics*, 22, 11217-11238, 2022.
- Fast, J. D., Berg, L. K., Alexander, L., Bell, D., D'Ambro, E., Hubbe, J., Kuang, C., Liu, J., Long, C., and Matthews, A.: Overview of the HI-SCALE field campaign: A new perspective on shallow convective clouds, *Bulletin of the American Meteorological Society*, 100, 821-840, 2019.
- 640 Friedlander, S. K.: *Smoke, dust, and haze: fundamentals of aerosol behavior*, Oxford University Press, New York, USA2000.
- Heinritzi, M., Dada, L., Simon, M., Stolzenburg, D., Wagner, A. C., Fischer, L., Ahonen, L. R., Amanatidis, S., Baalbaki, R., and Baccarini, A.: Molecular understanding of the suppression of new-particle formation by isoprene, *Atmospheric Chemistry and Physics*, 20, 11809-11821, 2020.
- 645 Hodshire, A. L., Lawler, M. J., Zhao, J., Ortega, J., Jen, C., Yli-Juuti, T., Brewer, J. F., Kodros, J. K., Barsanti, K. C., and Hanson, D. R.: Multiple new-particle growth pathways observed at the US DOE Southern Great Plains field site, *Atmospheric Chemistry and Physics*, 2016.
- Kuang, C., McMurry, P. H., and McCormick, A. V.: Determination of cloud condensation nuclei production from measured new particle formation events, *Geophysical Research Letters*, 36, 2009.
- 650 Kuang, C., McMurry, P. H., McCormick, A. V., and Eisele, F.: Dependence of nucleation rates on sulfuric acid vapor concentration in diverse atmospheric locations, *Journal of Geophysical Research: Atmospheres*, 113, 2008.
- Kulkarni, G., Mei, F., Shilling, J. E., Wang, J., Revegino, R. P., Flynn, C., Zelenyuk, A., and Fast, J.: Cloud Condensation Nuclei Closure Study Using Airborne Measurements over the Southern Great Plains, *Journal of Geophysical Research: Atmospheres*, e2022JD037964, 2023.
- 655 Kulkarni, P. and Wang, J.: New fast integrated mobility spectrometer for real-time measurement of aerosol size distribution—I: Concept and theory, *Journal of aerosol science*, 37, 1303-1325, 2006.
- Lee, S. H., Uin, J., Guenther, A. B., de Gouw, J. A., Yu, F., Nadykto, A. B., Herb, J., Ng, N. L., Koss, A., and Brune, W. H.: Isoprene suppression of new particle formation: Potential mechanisms and implications, *Journal of Geophysical Research: Atmospheres*, 121, 14,621-614,635, 2016.
- 660 Liu, J., Alexander, L., Fast, J. D., Lindenmaier, R., and Shilling, J. E.: Aerosol characteristics at the Southern Great Plains site during the HI-SCALE campaign, *Atmospheric Chemistry and Physics*, 21, 5101-5116, 2021.
- Marinescu, P. J., Levin, E. J., Collins, D., Kreidenweis, S. M., and van den Heever, S. C.: Quantifying aerosol size distributions and their temporal variability in the Southern Great Plains, USA, *Atmospheric Chemistry and Physics*, 19, 11985-12006, 2019.
- 665 Mather, J. H. and Voyles, J. W.: The ARM Climate Research Facility: A review of structure and capabilities, *Bulletin of the American Meteorological Society*, 94, 377-392, 2013.
- Mattis, I., Ansmann, A., Wandinger, U., and Müller, D. J. G. r. l.: Unexpectedly high aerosol load in the free troposphere over central Europe in spring/summer 2003, 30, 2003.
- 670 NWCG: *Fire Behavior Field Reference Guide*, PMS 437 2021.



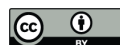

- O'Donnell, S. E., Akherati, A., He, Y., Hodshire, A. L., Shilling, J. E., Kuang, C., Fast, J. D., Mei, F., Schobesberger, S., and Thornton, J. A.: Look Up: Probing the Vertical Profile of New Particle Formation and Growth in the Planetary Boundary Layer With Models and Observations, *Journal of Geophysical Research: Atmospheres*, 128, e2022JD037525, 2023.
- 675 Parworth, C., Fast, J., Mei, F., Shippert, T., Sivaraman, C., Tilp, A., Watson, T., and Zhang, Q.: Long-term measurements of submicrometer aerosol chemistry at the Southern Great Plains (SGP) using an Aerosol Chemical Speciation Monitor (ACSM), *Atmospheric Environment*, 106, 43-55, 2015.
- Patel, P. N. and Jiang, J. H.: Cloud condensation nuclei characteristics at the Southern Great Plains site: role of particle size distribution and aerosol hygroscopicity, *Environmental Research Communications*, 3, 075002, 2021.
- 680 Pepler, R. A., Bahrmann, C., Barnard, J. C., Campbell, J., Cheng, M.-D., Ferrare, R., Halthore, R., Heilman, L., Hlavka, D., and Laulainen, N. S. J. B. o. t. A. M. S.: ARM Southern Great Plains site observations of the smoke pall associated with the 1998 Central American fires, 81, 2563-2592, 2000.
- Schmid, B., Tomlinson, J. M., Hubbe, J. M., Comstock, J. M., Mei, F., Chand, D., Pekour, M. S., Kluzek, C. D., Andrews, E., and Biraud, S. J. B. o. t. A. M. S.: The DOE ARM aerial facility, 95, 723-742, 2014.
- 685 Smith, J. and McMurry, P.: New Particle Formation Study Final Campaign Report. Ed. by Robert Stafford, DOE ARM Climate Research Facility, DOE/SC-ARM-15-011, 2015.
- Smith, J., Stark, H., Browne, E., and Hanson, D.: HI-SCALE Nanoparticle Composition and Precursors Field Campaign Report, DOE Office of Science Atmospheric Radiation Measurement (ARM) Program ..., 2017.
- Stein, A., Draxler, R. R., Rolph, G. D., Stunder, B. J., Cohen, M., and Ngan, F. J. B. o. t. A. M. S.: NOAA's HYSPLIT atmospheric transport and dispersion modeling system, 96, 2059-2077, 2015.
- 690 Trishchenko, A., Luo, Y., Latifovic, R., and Li, Z.: Land cover type distribution over the ARM SGP area for atmospheric radiation and environmental research. ARM Science Team Meeting, March 22-26, 2004, Albuquerque, New Mexico, 2004.
- Wang, D., Giangrande, S. E., Schiro, K. A., Jensen, M. P., and Houze Jr, R. A.: The characteristics of tropical and midlatitude mesoscale convective systems as revealed by radar wind profilers, *Journal of Geophysical Research: Atmospheres*, 124, 4601-4619, 2019.
- 695 Wang, J., Daum, P. H., Kleinman, L. I., Lee, Y. N., Schwartz, S. E., Springston, S. R., Jonsson, H., Covert, D., and Elleman, R. J. J. o. G. R. A.: Observation of ambient aerosol particle growth due to in-cloud processes within boundary layers, 112, 2007.
- Wang, J., Collins, D., Covert, D., Elleman, R., Ferrare, R. A., Gasparini, R., Jonsson, H., Ogren, J., Sheridan, P., and Tsay, S. C.: Temporal variation of aerosol properties at a rural continental site and study of aerosol evolution through growth law analysis, *Journal of Geophysical Research: Atmospheres*, 111, 2006.
- 700 Wang, J., Krejci, R., Giangrande, S., Kuang, C., Barbosa, H. M., Brito, J., Carbone, S., Chi, X., Comstock, J., and Ditas, F. J. N.: Amazon boundary layer aerosol concentration sustained by vertical transport during rainfall, 539, 416-419, 2016.
- Wang, Y., Pinterich, T., and Wang, J. J. J. o. A. S.: Rapid measurement of sub-micrometer aerosol size distribution using a fast integrated mobility spectrometer, 121, 12-20, 2018.
- 705 Wang, Y., Zheng, G., Jensen, M. P., Knopf, D. A., Laskin, A., Matthews, A. A., Mechem, D., Mei, F., Moffet, R., Sedlacek, A. J. J. A. C., and Physics: Vertical profiles of trace gas and aerosol properties over the eastern North Atlantic: variations with season and synoptic condition, 21, 11079-11098, 2021.
- Williamson, C. J., Kupc, A., Axisa, D., Bilsback, K. R., Bui, T., Campuzano-Jost, P., Dollner, M., Froyd, K. D., Hodshire, A. L., and Jimenez, J. L.: A large source of cloud condensation nuclei from new particle formation in the tropics, *Nature*, 574, 399-403, 2019.
- 710 Xu, L., Guo, H., Boyd, C. M., Klein, M., Bougiatioti, A., Cerully, K. M., Hite, J. R., Isaacman-VanWertz, G., Kreisberg, N. M., and Knote, C. J. P. o. t. N. A. o. S.: Effects of anthropogenic emissions on aerosol formation from isoprene and monoterpenes in the southeastern United States, 112, 37-42, 2015.
- 715 Zheng, G., Wang, Y., Wood, R., Jensen, M. P., Kuang, C., McCoy, I. L., Matthews, A. A., Mei, F., Tomlinson, J. M., Shilling, J. E., Zawadowicz, M. M., Crosbie, E. C., Moore, R. H., Ziemba, L. D., Andreae, M. O., and Wang, J.: New particle formation in the remote marine boundary layer, *Nature Communications*, 12, 1-10, 2021.

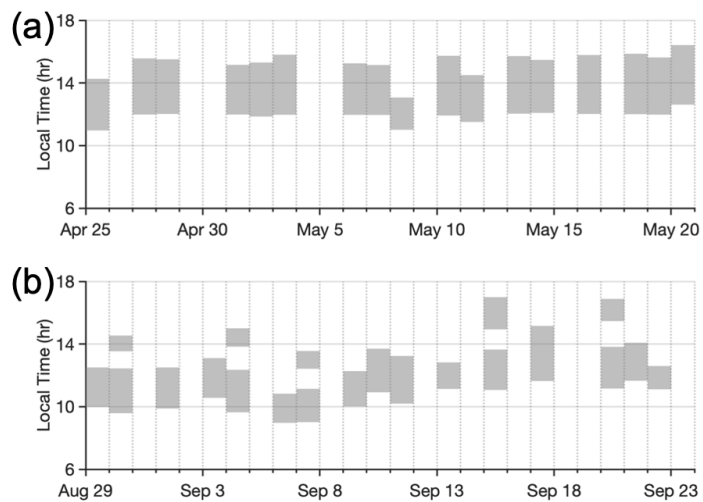

720

**Fig. 1.** Date and local time of the flights conducted during the HI-SCALE campaign: (a) spring IOP (b) summer IOP. During the summer IOP, same-day flights were conducted to examine the temporal variation of aerosols over the SGP.

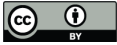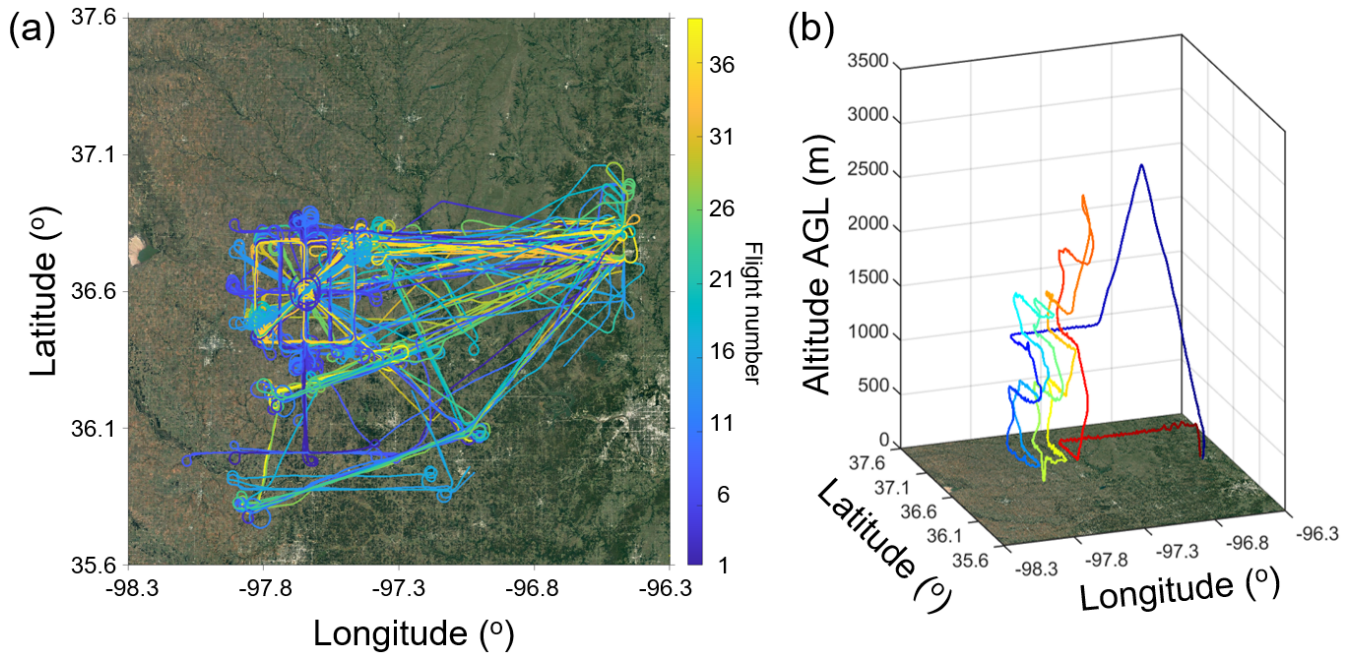

725 **Fig. 2. (a) Flight patterns used during the HI-SCALE campaign. A total number of 38 flights were conducted over the SGP observatory. Different colors of the flight patterns represent different flight numbers. (b) An example of a representative flight pattern on May 3, 2016. Maps are obtained from ©Google Maps.**

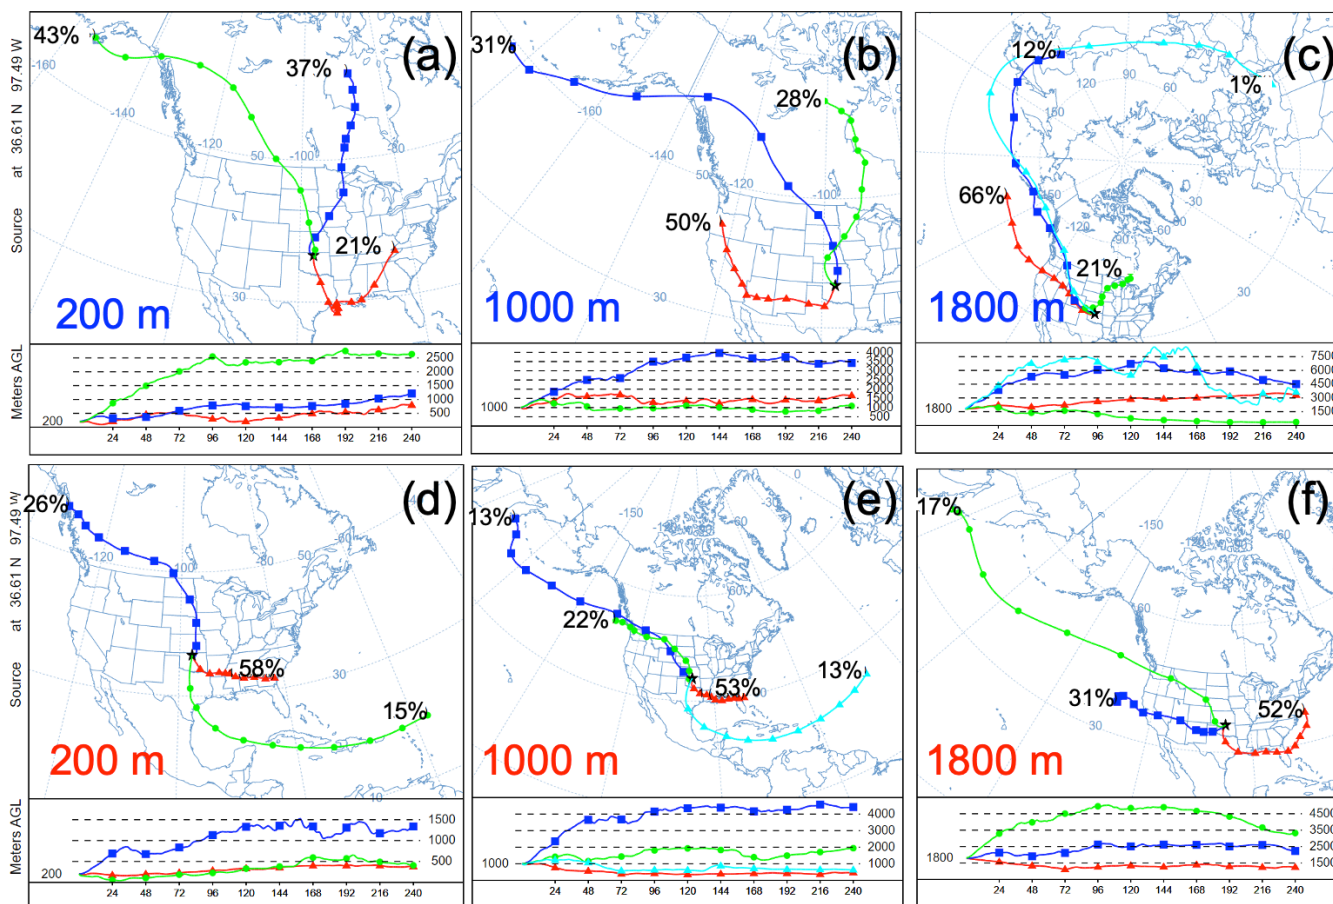

**Fig. 3.** Cluster analysis of 10-day back trajectories arriving at 200, 1000, and 1800 m above the SGP site during the spring (first row) and summer (second row) IOP. The average trajectories of the clusters are represented by different colors, and the associated numbers denote the occurrence percentages of the clusters.

730

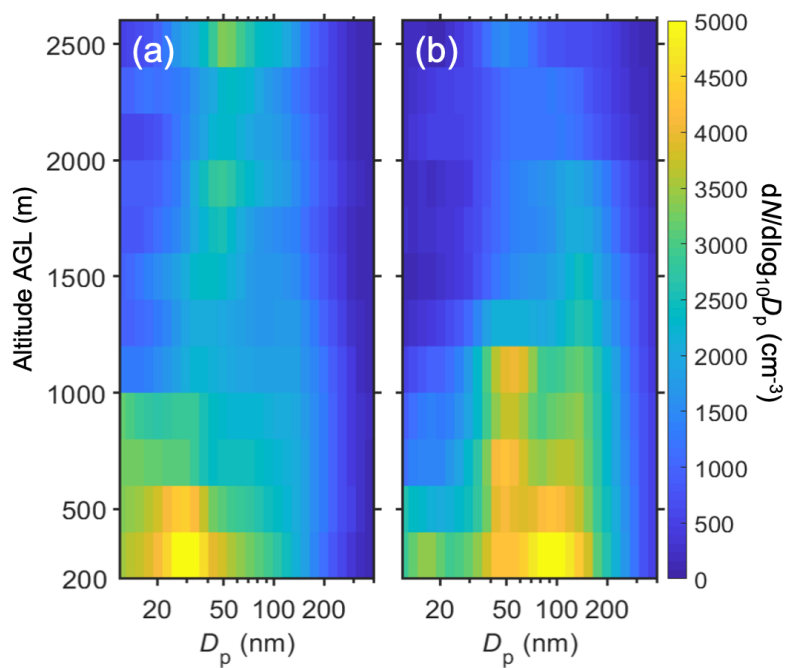

735 **Fig. 4. Vertical profiles of the mean aerosol size distributions during the (a) spring IOP and (b) summer IOP. The size distributions are normalized to standard temperature and pressure (273.15 K and 101.325 kPa; STP).**

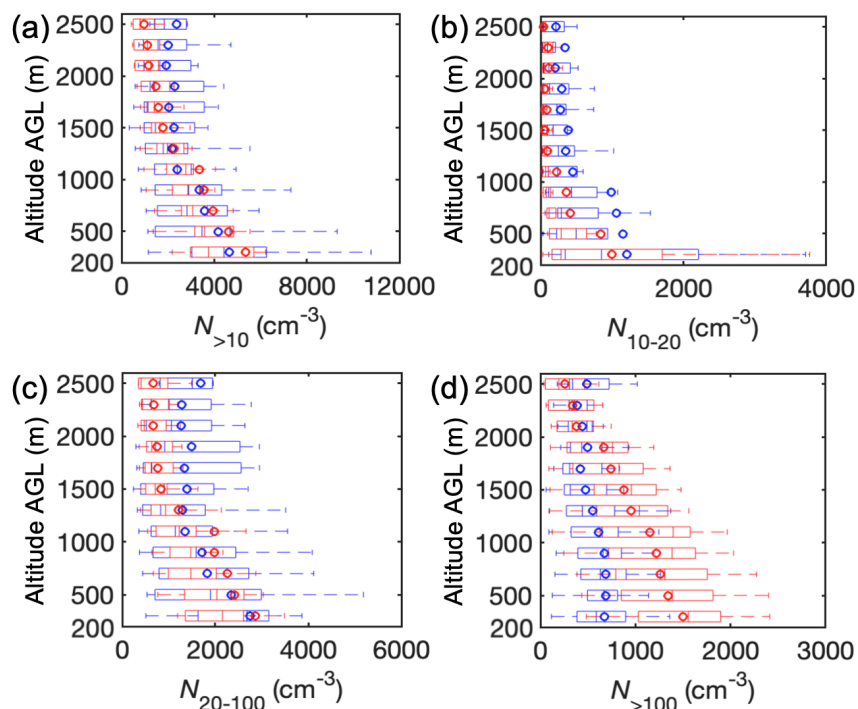

**Fig. 5.** Vertical profiles showing the concentrations of particles (a) larger than 10 nm ( $N_{>10}$ ), (b) with sizes between 10 and 20 nm ( $N_{10-20}$ , nucleation-mode), (c) with sizes between 20 and 100 nm ( $N_{20-100}$ , Aitken-mode), (d) with sizes above 100 nm ( $N_{>100}$ , accumulation-mode) over the SGP site during the spring IOP (blue) and summer IOP (red). The line and circle markers represent the median and mean of the data, and the edges of the box indicate the 25th and 75th percentiles, respectively. The concentrations are normalized to standard temperature and pressure (273.15 K and 101.325 kPa; STP).

740



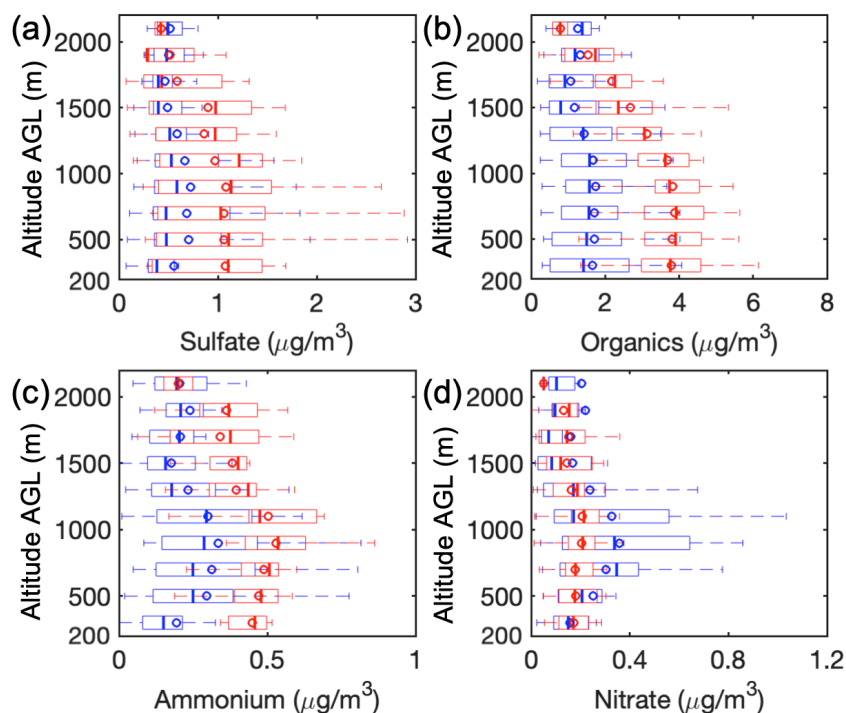

745 **Fig. 6.** Vertical profiles of the mass concentrations of (a) sulfate, (b) organics, (c) ammonium, and (d) nitrate over the SGP during  
 the spring IOP (blue) and summer IOP (red). The compositions are measured by the HR-ToF-AMS. The concentration of chloride  
 is too low, and therefore, is not shown in the figure. The line and circle markers represent the median and mean of the data, and the  
 edges of the box indicate the 25th and 75th percentiles, respectively. The concentrations are normalized to standard temperature  
 and pressure (273.15 K and 101.325 kPa; STP).

750

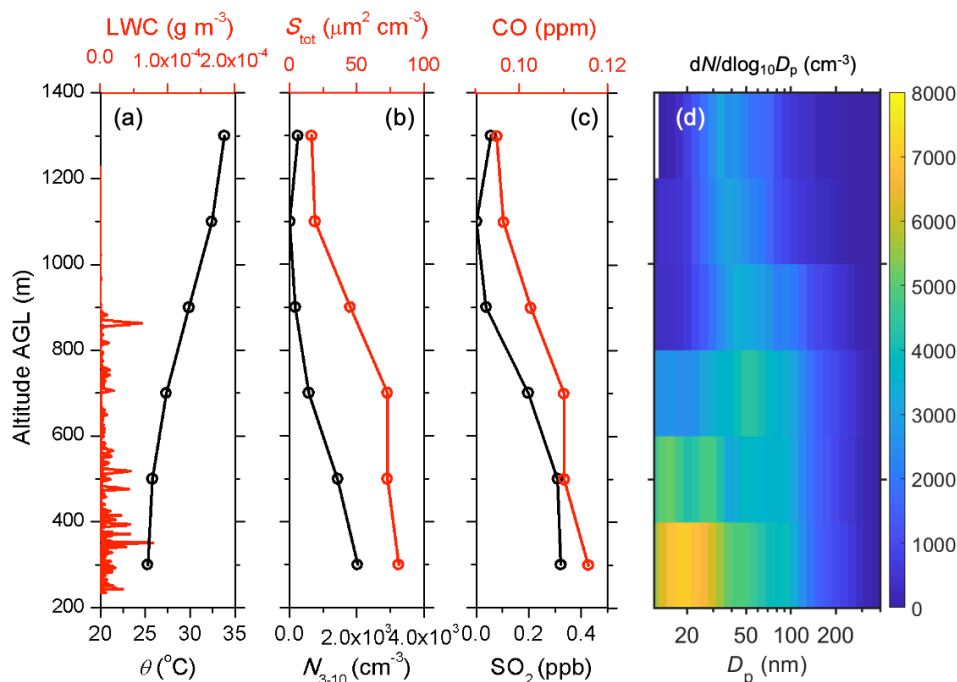

**Fig. 7.** Vertical profiles of parameters during a NPF event occurring at the surface of the SGP site on September 11, 2016. (a) Potential temperature ( $\theta$ ) and liquid water content (LWC). (b) Concentration of particles between 3 and 10 nm ( $N_{3-10}$ ) and total aerosol surface area concentration. (c) Mixing ratios of carbon monoxide (CO) and sulfur dioxide ( $\text{SO}_2$ ). (d) Vertical profile of aerosol size distributions as a function of altitude. The particle concentrations, surface area concentrations, and size distributions are normalized to standard temperature and pressure (273.15 K and 101.325 kPa; STP). Note that  $\text{SO}_2$  mixing ratio is corrected by a constant offset so that the minimum mixing ratio value is set to 0.

755

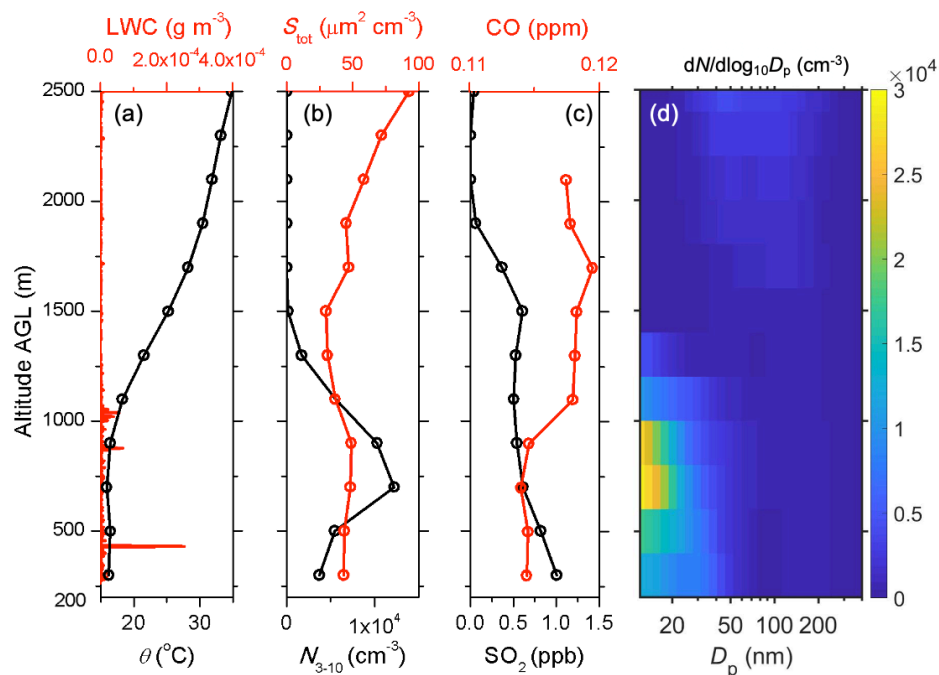

760 Fig. 8. Vertical profiles of parameters during a NPF event occurring at upper boundary layer over the SGP site on May 14, 2016.  
 (a) Potential temperature ( $\theta$ ) and liquid water content (LWC). (b) Concentration of particles between 3 and 10 nm ( $N_{3-10}$ ) and total  
 765 aerosol surface area concentration. (c) Mixing ratios of carbon monoxide (CO) and sulfur dioxide ( $\text{SO}_2$ ). (d) Vertical profile of  
 aerosol size distributions as a function of altitude. The particle concentrations, surface area concentrations, and size distributions  
 are normalized to standard temperature and pressure (273.15 K and 101.325 kPa; STP). Note that  $\text{SO}_2$  mixing ratio is corrected by  
 a constant offset so that the minimum mixing ratio value is set to 0.

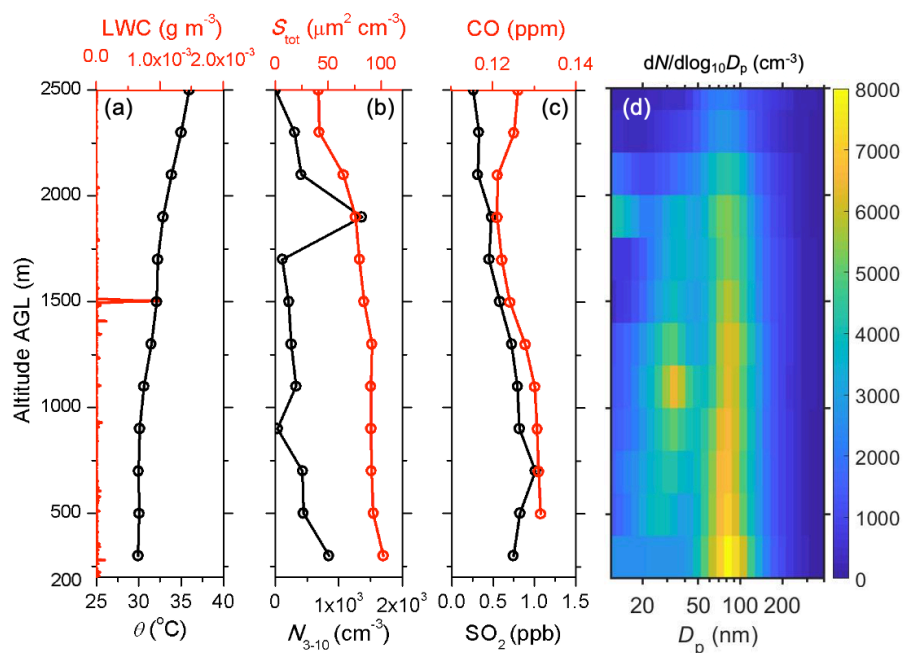

**Fig. 9.** Vertical profiles of parameters during a NPF event occurring in the free troposphere over the SGP site on May 13, 2016. (a) Potential temperature ( $\theta$ ) and liquid water content (LWC). (b) Concentration of particles between 3 and 10 nm ( $N_{3-10}$ ) and total aerosol surface area concentration. (c) Mixing ratios of carbon monoxide (CO) and sulfur dioxide ( $\text{SO}_2$ ). (d) Vertical profile of aerosol size distributions as a function of altitude. The particle concentrations, surface area concentrations, and size distributions are normalized to standard temperature and pressure (273.15 K and 101.325 kPa; STP). Note that  $\text{SO}_2$  mixing ratio is corrected by a constant offset so that the minimum mixing ratio value is set to 0.

770

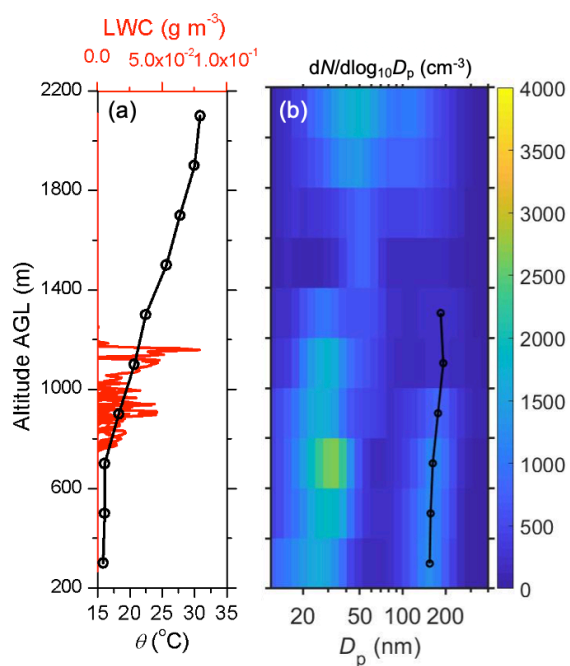

775

**Fig. 10.** Vertical profiles of parameters during a cloud processing event over the SGP site on May 1, 2016. (a) Potential temperature ( $\theta$ ) and liquid water content (LWC). (b) Vertical profile of aerosol size distributions as a function of altitude. The black line shows the mode diameter of the accumulation mode aerosols. The particle concentrations, surface area concentrations, and size distributions are normalized to standard temperature and pressure (273.15 K and 101.325 kPa; STP).

780

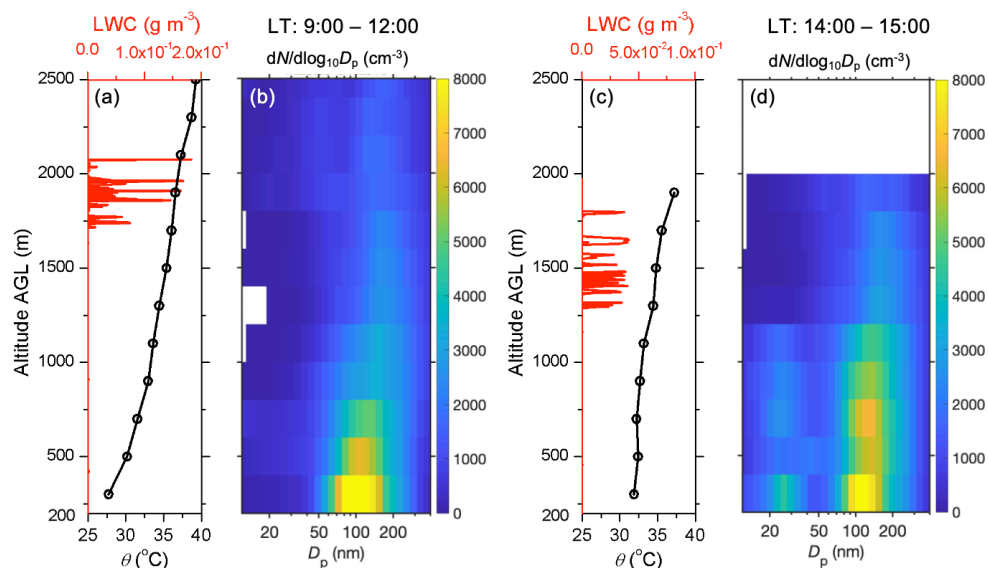

**Fig. 11.** Vertical profiles of parameters over the SGP site on September 4, 2016. (a) and (b) correspond to local time of 9:00 to 12:00, and (c) and (d) correspond to local time of 14:00 to 15:00. (a) and (c) Potential temperature ( $\theta$ ) and liquid water content (LWC). (b) and (d) Vertical profile of aerosol size distributions as a function of altitude. The size distributions are normalized to standard temperature and pressure (273.15 K and 101.325 kPa; STP).

785



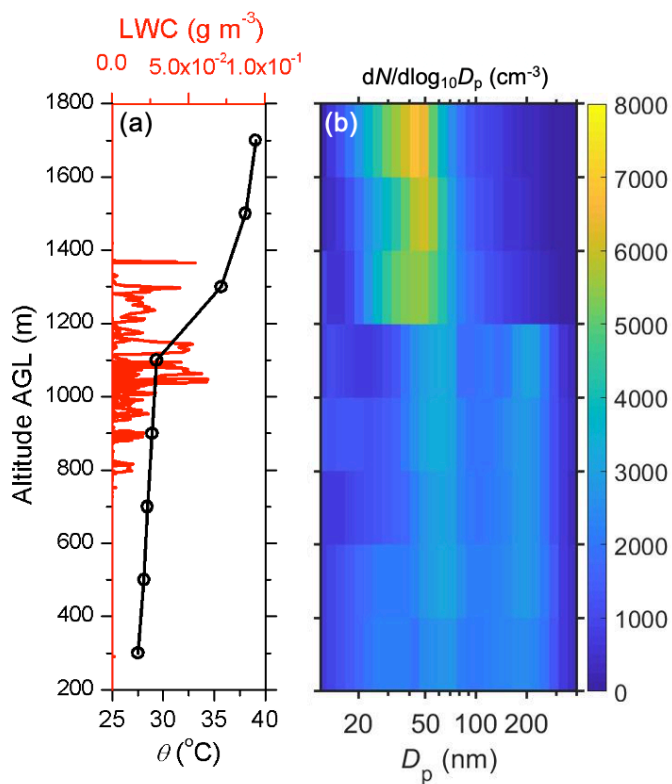

790 **Fig. 12.** Vertical profiles of parameters during an entrainment event over the SGP site on April 25, 2016. (a) Potential temperature ( $\theta$ ) and liquid water content (LWC). (b) Vertical profile of aerosol size distributions as a function of altitude. The particle concentrations, surface area concentrations, and size distributions are normalized to standard temperature and pressure (273.15 K and 101.325 kPa; STP).

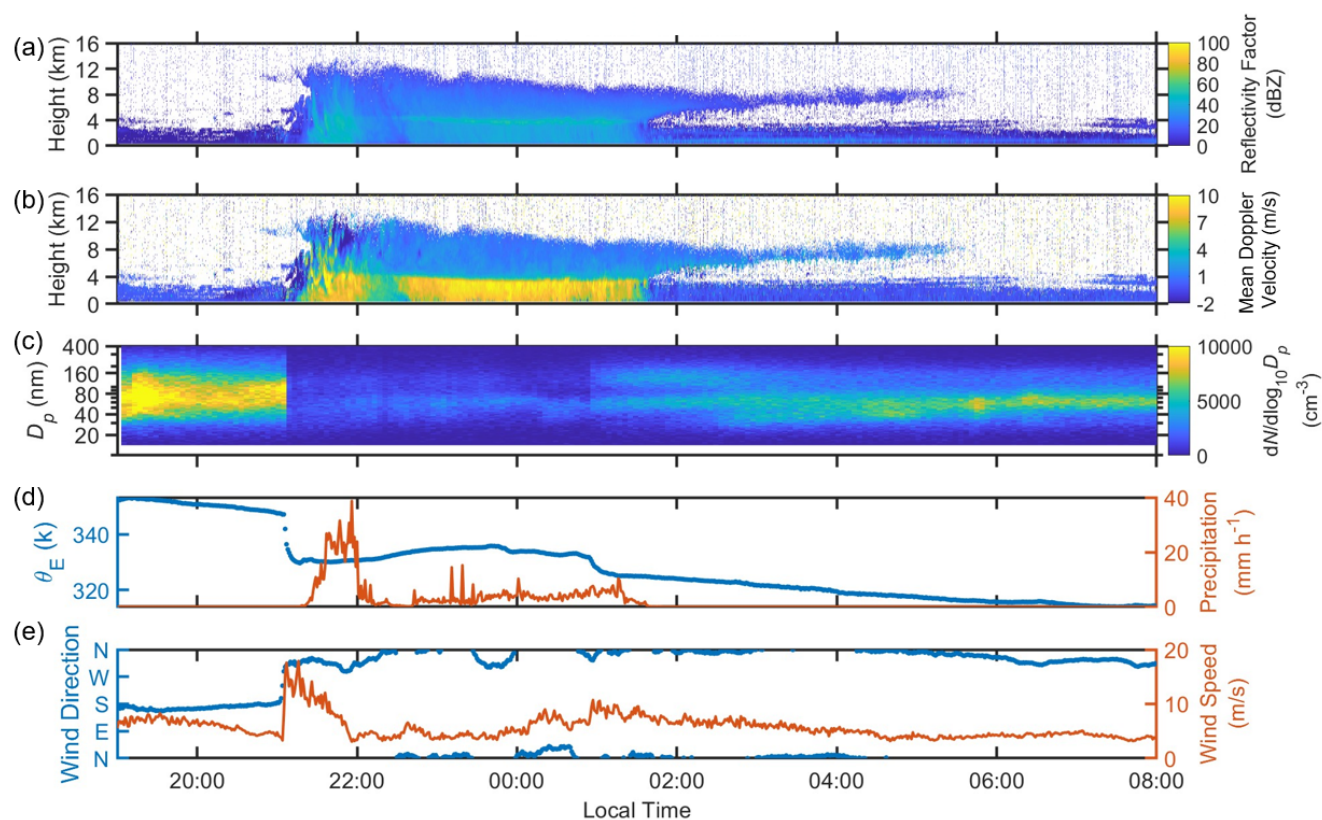

**Fig. 13.** Ground measurements of aerosol, cloud, and meteorological properties during the convective downward transport event from September 9 to 10, 2016. (a) Cloud reflectivity measured by RWP. (b) Mean Doppler velocities measured by the radar wind profiler (RWP). A positive value indicates downward motion. (c) Aerosol size distributions measured by a scanning mobility particle sizer (SMPS). (d) Equivalent potential temperature and precipitation rate measured by the weather station. (e) Wind direction and wind speed measured by the weather station.

795

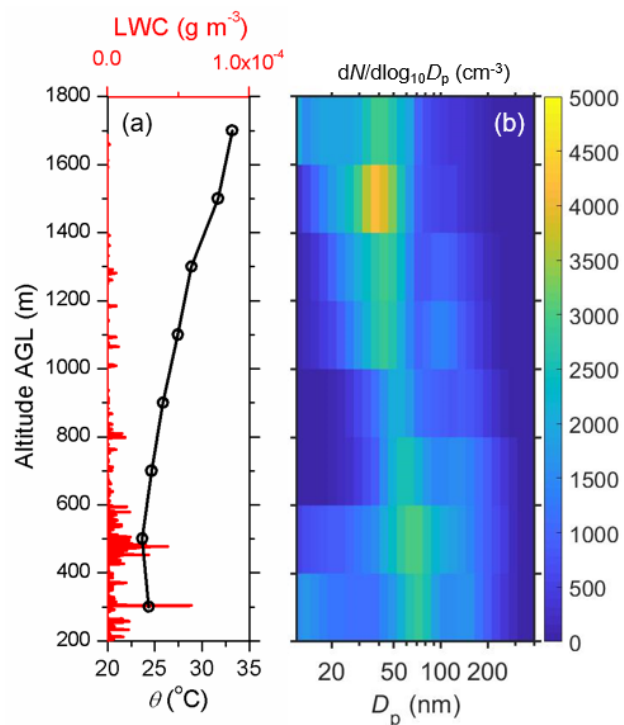

800 Fig. 14. Vertical profiles of parameters during a convective downward transport event over the SGP site on September 10, 2016. (a) Potential temperature ( $\theta$ ) and liquid water content (LWC). (b) Vertical profile of aerosol size distributions as a function of altitude. The particle concentrations, surface area concentrations, and size distributions are normalized to standard temperature and pressure (273.15 K and 101.325 kPa; STP).

805

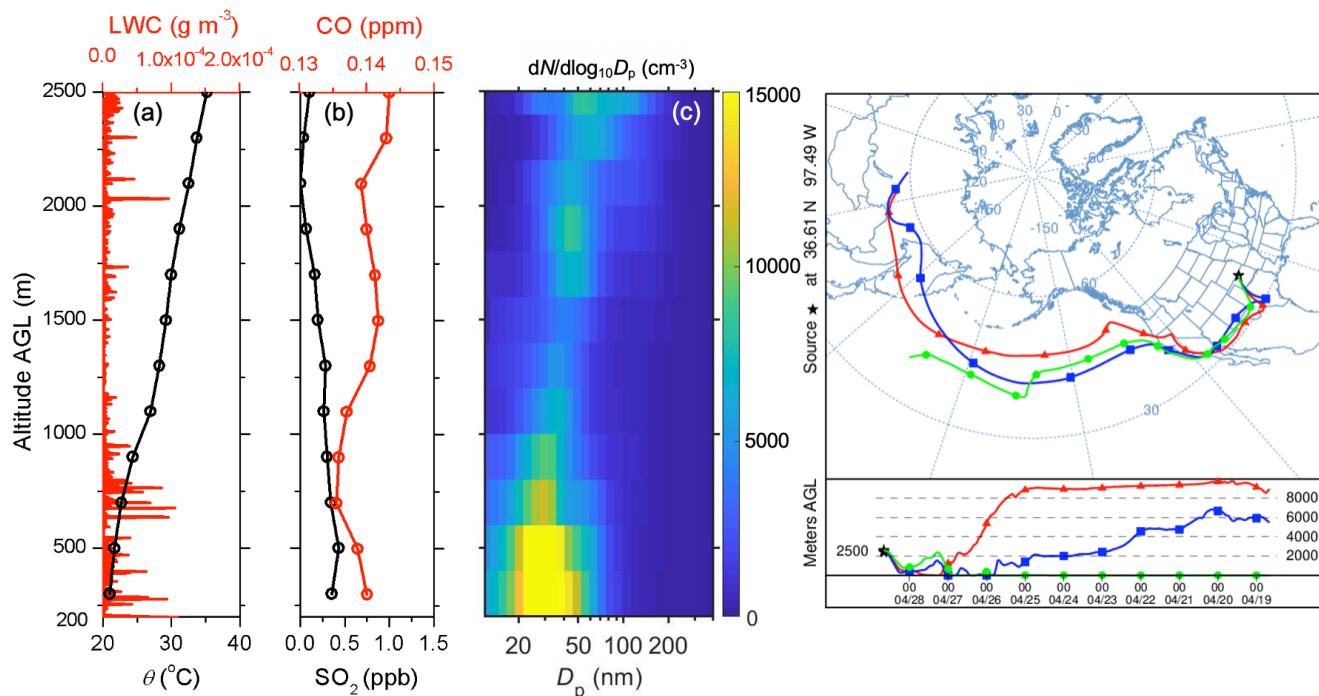

Fig. 15. A long-range transport event observed during the research flight on April 28, 2016. (a) Vertical profiles of potential temperature ( $\theta$ ) and liquid water content (LWC). (b) Mixing ratios of carbon monoxide (CO) and sulfur dioxide ( $\text{SO}_2$ ). (c) Vertical profile of aerosol size distributions as a function of altitude. (d) 10-day back trajectories reaching the altitude of 2400 to 2600 m above SGP on April 28, 2016. The particle concentrations, surface area concentrations, and size distributions are normalized to standard temperature and pressure (273.15 K and 101.325 kPa; STP). Note that  $\text{SO}_2$  mixing ratio is corrected by a constant offset so that the minimum mixing ratio value is set to 0.

810
